# Supplementary material for: Quantitative trait loci for yield and grain plumpness relative to maturity in three populations of barley (Hordeum vulgare L.) grown in a low rain-fall environment
Source: PubMed Central journal article supplement (PMC5441627; doi:10.1371/journal.pone.0178111), 2017-05-23
Supplement: pone.0178111.s001.pdf [file pone.0178111.s001.pdf]

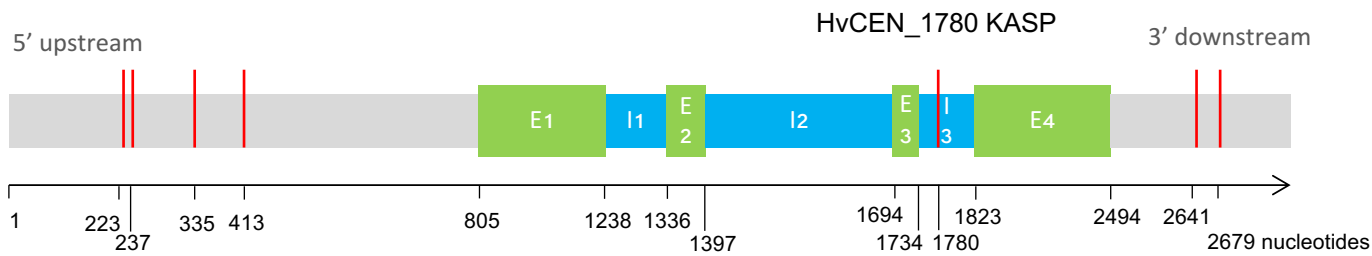

**S1 Fig. Structure of the *HvCEN* gene sequence of the Australian parental lines.** The grey box are the 5' upstream and 3' downstream regions. The exons are represented in green and the introns in blue. Sequence variations between Fleet, Commander and WI4304 are shown by red bars. HvCEN\_1780 is the SNP converted into KASP marker for genetic mapping of *HvCEN* gene. Annotation is based on Ensembl MLOC\_44160.1.
