# Supplementary material for: Quantitative trait loci for yield and grain plumpness relative to maturity in three populations of barley (Hordeum vulgare L.) grown in a low rain-fall environment
Source: PubMed Central journal article supplement (PMC5441627; doi:10.1371/journal.pone.0178111), 2017-05-23

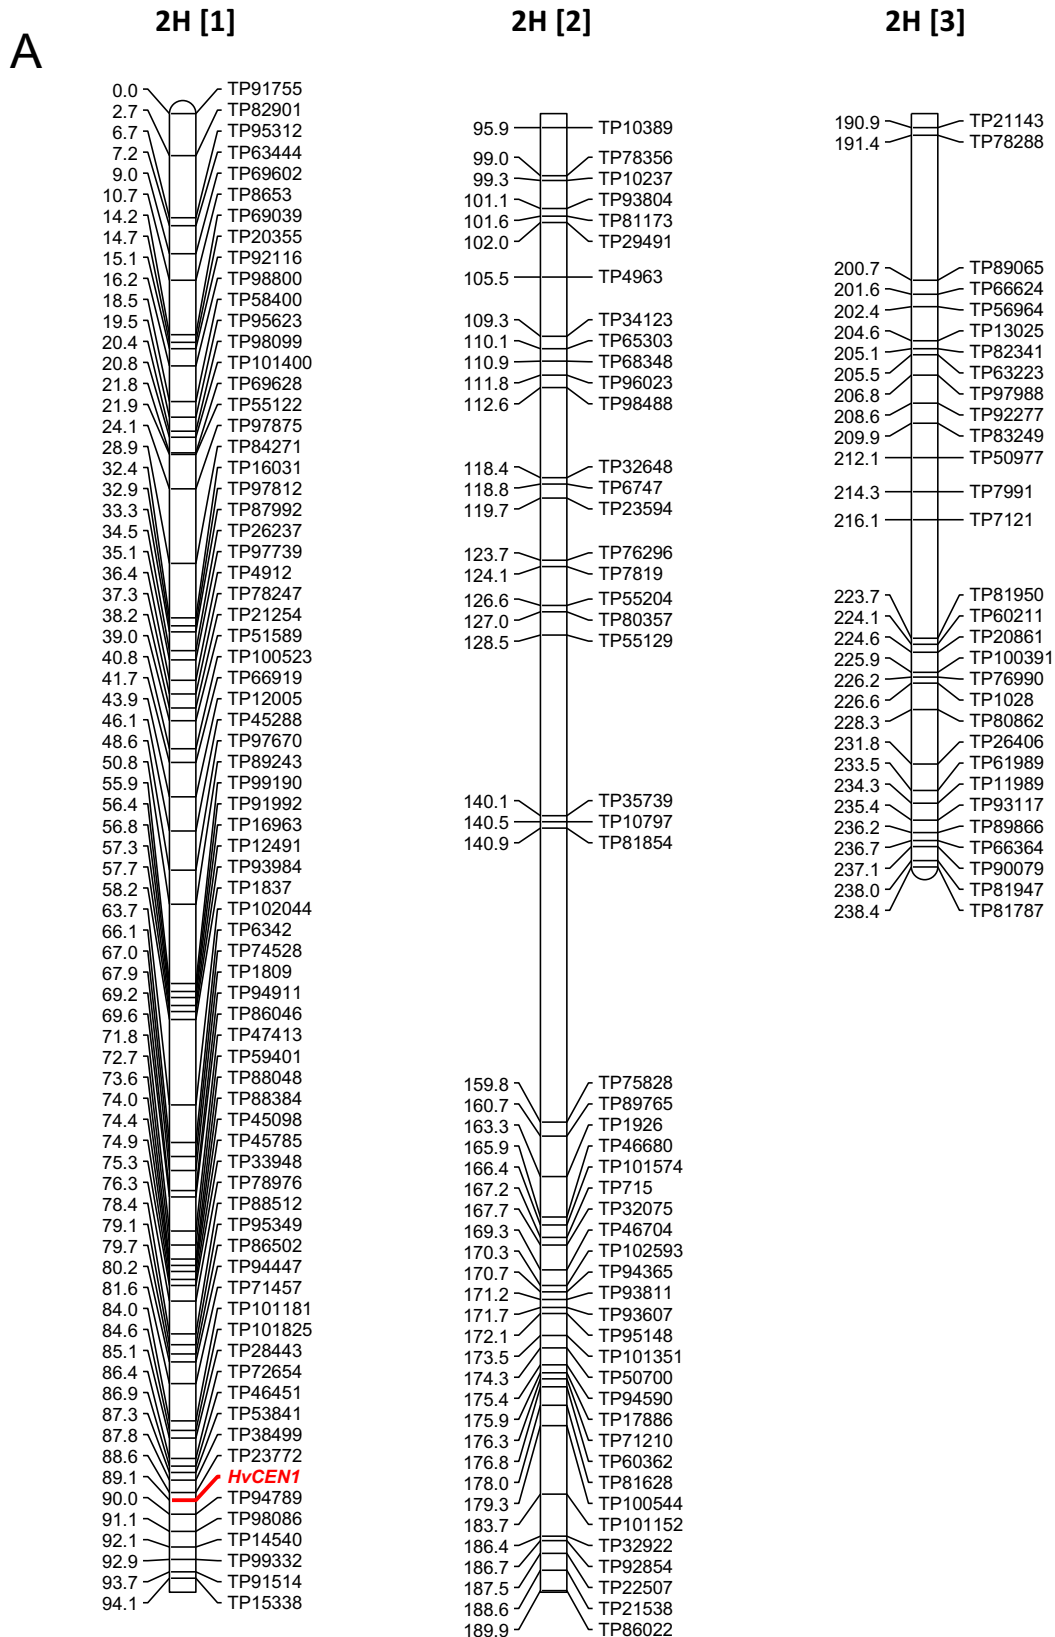

**S2 Fig. Genetic map of chromosome 2H in the CW (A) and FW (B) populations.**

**B****2H [1]**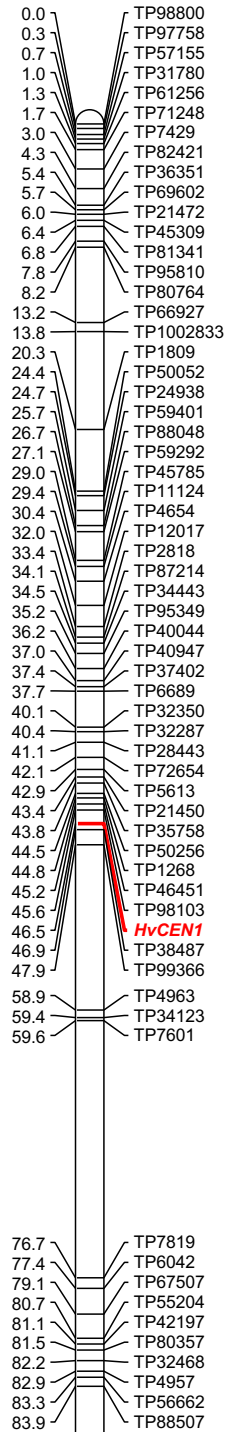**2H [2]**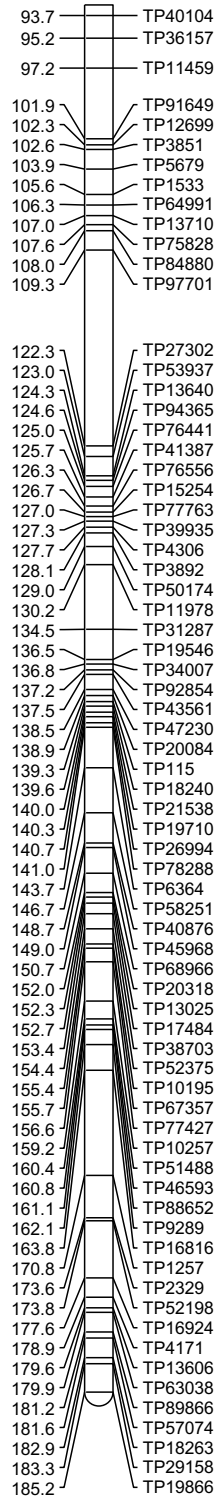

Supplement: pone.0178111.s002.pdf [file pone.0178111.s002.pdf]
