# Supplementary material for: Quantitative trait loci for yield and grain plumpness relative to maturity in three populations of barley (Hordeum vulgare L.) grown in a low rain-fall environment
Source: PubMed Central journal article supplement (PMC5441627; doi:10.1371/journal.pone.0178111), 2017-05-23
Supplement: pone.0178111.s003.pdf [file pone.0178111.s003.pdf]

CF: MRC12

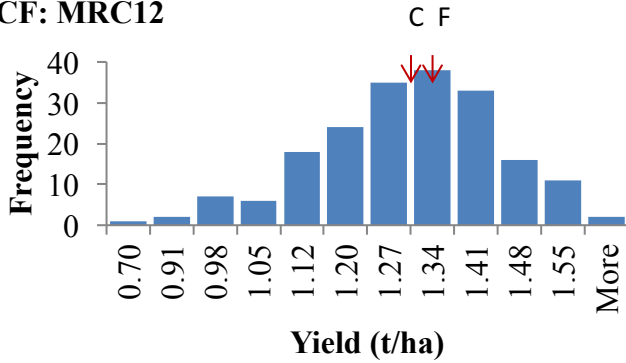

CF: MRC13

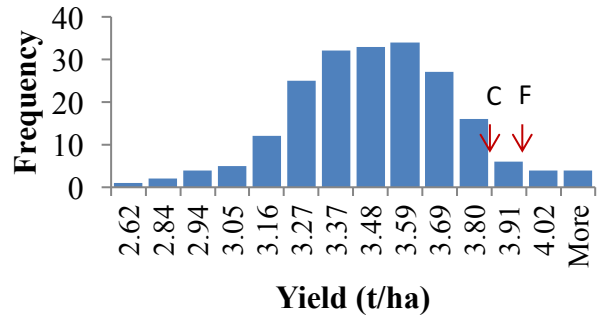

CF: RAC12

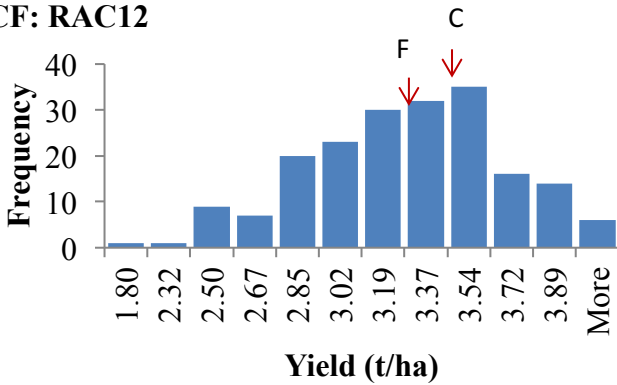

CF: RAC13

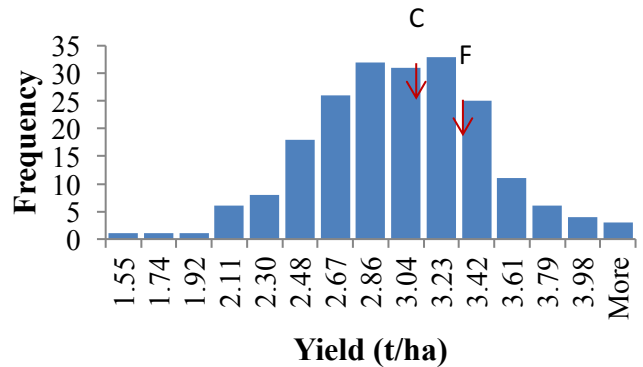

CF: SWH12

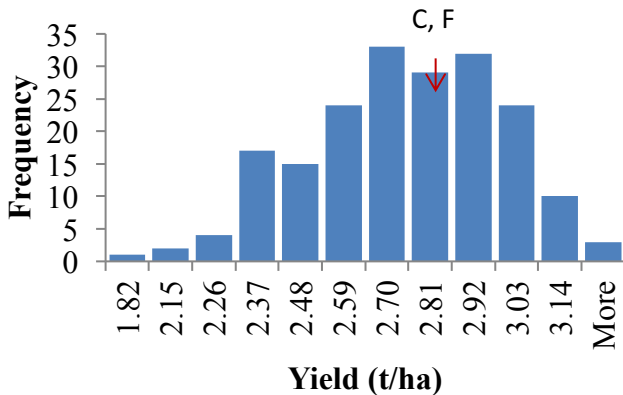

CF: SWH13

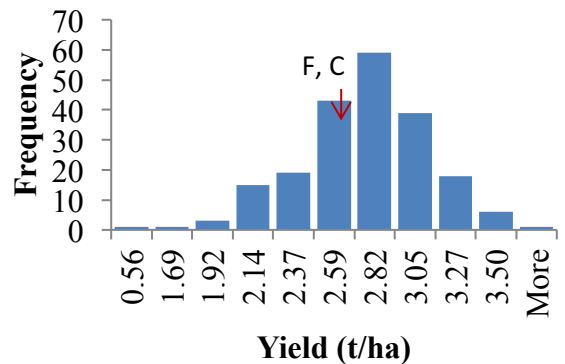

S3 Fig. Histogram of yield at six environments in the CF population. CF= Commander x Fleet, MRC12= Minnipa 2012, MRC13= Minnipa 2013, RAC12= Roseworthy 2012, RAC13= Roseworthy 2013, SWH12= Swan Hill 2012, SWH13= Swan Hill 2013.
