# Supplementary material for: Quantitative trait loci for yield and grain plumpness relative to maturity in three populations of barley (Hordeum vulgare L.) grown in a low rain-fall environment
Source: PLoS One. 2017 May 23;12(5):e0178111. doi: 10.1371/journal.pone.0178111 (PMC5441627; doi:10.1371/journal.pone.0178111)
Supplement: S1 Table — (XLSX) [file pone.0178111.s007.xlsx]

## Sheet: Sheet1
S1 Table. Anchoring of the GBS markers onto the barley RefSeq v1.0 of the map-based sequence of cultivar Morex.
								genome sequence coordinates (bp)
GBS tag	Chromosome	% identical matches	Alignment length	mismatch	gapopen	qstart	qend	sstart	send	evalue	bitscore	QTL from [36] and present manuscript	Comment
TP27638	chr1H	100	58	0	0	1	58	44461	44518	5e-22	108
TP71613	chr1H	100	64	0	0	1	64	51874	51937	2e-25	119
TP94254	chr1H	100	64	0	0	1	64	263573	263636	2e-25	119
TP13563	chr1H	100	64	0	0	1	64	269999	270062	2e-25	119
TP75277	chr1H	98.44	64	1	0	1	64	277641	277704	1e-23	113
TP27952	chr1H	96.88	64	2	0	1	64	278400	278337	5e-22	108
TP60431	chr1H	100	64	0	0	1	64	945289	945352	2e-25	119
TP54458	chr1H	98.44	64	1	0	1	64	975338	975401	1e-23	113
TP76302	chr1H	100	39	0	0	1	39	975341	975303	2e-11	73.1
TP71080	chr1H	100	64	0	0	1	64	1249337	1249400	2e-25	119
TP34960	chr1H	100	64	0	0	1	64	1249340	1249277	2e-25	119
TP85105	chr1H	100	64	0	0	1	64	1312596	1312659	2e-25	119
TP51050	chr1H	100	52	0	0	1	52	2302234	2302183	1e-18	97.1
TP87811	chr1H	100	64	0	0	1	64	2477896	2477833	2e-25	119
TP97633	chr1H	96.88	64	2	0	1	64	2740738	2740675	5e-22	108
TP17984	chr1H	98.44	64	1	0	1	64	2769949	2770012	1e-23	113
TP86813	chr1H	100	64	0	0	1	64	2968590	2968527	2e-25	119
TP25734	chr1H	98.44	64	1	0	1	64	3677371	3677434	1e-23	113
TP49631	chr1H	100	64	0	0	1	64	4061799	4061862	2e-25	119
TP66653	chr1H	100	64	0	0	1	64	4182853	4182916	2e-25	119
TP53580	chr1H	98.44	64	1	0	1	64	4183136	4183073	1e-23	113
TP26232	chr1H	98.44	64	1	0	1	64	4212112	4212175	1e-23	113
TP16376	chr1H	100	42	0	0	1	42	4653928	4653969	4e-13	78.7
TP50683	chr1H	98.44	64	1	0	1	64	5010086	5010023	1e-23	113
TP55165	chr1H	97.83	46	1	0	1	46	6330143	6330188	1e-13	80.5
TP85764	chr1H	96.88	64	2	0	1	64	6351948	6351885	5e-22	108
TP65901	chr1H	100	64	0	0	1	64	6550193	6550256	2e-25	119
TP100086	chr1H	100	64	0	0	1	64	6995156	6995219	2e-25	119
TP81664	chr1H	100	64	0	0	1	64	7713709	7713772	2e-25	119
TP3178	chr1H	98.44	64	1	0	1	64	8049563	8049500	1e-23	113
TP85309	chr1H	98.44	64	1	0	1	64	8363478	8363415	1e-23	113
TP82323	chr1H	98.44	64	1	0	1	64	8491532	8491595	1e-23	113
TP17474	chr1H	98.44	64	1	0	1	64	8491535	8491472	1e-23	113
TP101879	chr1H	98.41	63	1	0	1	63	9237043	9237105	4e-23	111
TP97425	chr1H	98.44	64	1	0	1	64	9255616	9255553	1e-23	113
TP38056	chr1H	98.44	64	1	0	1	64	9646519	9646456	1e-23	113
TP9255	chr1H	98.44	64	1	0	1	64	9673693	9673756	1e-23	113
TP53151	chr1H	100	64	0	0	1	64	9940061	9939998	2e-25	119
TP26647	chr1H	100	64	0	0	1	64	9954388	9954325	2e-25	119
TP85642	chr1H	98.44	64	1	0	1	64	10240816	10240753	1e-23	113
TP75271	chr1H	96.88	64	2	0	1	64	10258048	10258111	5e-22	108
TP61411	chr1H	98	50	1	0	1	50	10635100	10635051	6e-16	87.9
TP89900	chr1H	100	51	0	0	1	51	10753112	10753162	4e-18	95.3
TP89901	chr1H	100	51	0	0	1	51	10753112	10753162	4e-18	95.3
TP60292	chr1H	100	64	0	0	1	64	10962374	10962437	2e-25	119
TP67980	chr1H	96.88	64	2	0	1	64	10962834	10962897	5e-22	108
TP96347	chr1H	100	64	0	0	1	64	10965685	10965748	2e-25	119
TP80789	chr1H	100	64	0	0	1	64	11193331	11193394	2e-25	119
TP71482	chr1H	100	64	0	0	1	64	11193334	11193271	2e-25	119
TP95203	chr1H	90.57	53	5	0	12	64	11376634	11376686	6e-11	71.3
TP35573	chr1H	95.56	45	2	0	4	48	11453076	11453120	2e-11	73.1
TP35969	chr1H	100	61	0	0	1	61	11527006	11526946	1e-23	113
TP65962	chr1H	100	41	0	0	1	41	11561322	11561282	1e-12	76.8
TP31142-TP55612	chr1H	89.06	64	1	1	1	64	12424928	12424871	5e-12	75	QLwax.CF-1H
TP52388	chr1H	100	64	0	0	1	64	12548325	12548388	2e-25	119
TP11553	chr1H	98.44	64	1	0	1	64	12556738	12556801	1e-23	113
TP37062	chr1H	98.44	64	1	0	1	64	13038589	13038652	1e-23	113
TP97048	chr1H	100	64	0	0	1	64	13151745	13151682	2e-25	119
TP102037	chr1H	100	64	0	0	1	64	13286154	13286217	2e-25	119
TP6271	chr1H	100	64	0	0	1	64	13348627	13348690	2e-25	119
TP55612	chr1H	98.44	64	1	0	1	64	14003887	14003950	1e-23	113
TP40127	chr1H	100	37	0	0	3	39	14383809	14383845	2e-10	69.4
TP39743	chr1H	98.44	64	1	0	1	64	15591574	15591637	1e-23	113
TP2963	chr1H	95.16	62	2	1	1	61	15959439	15959500	1e-18	97.1
TP347	chr1H	98.44	64	1	0	1	64	15960044	15959981	1e-23	113
TP22355	chr1H	95.65	46	2	0	1	46	17290715	17290670	5e-12	75
TP89718	chr1H	98	50	1	0	1	50	17579475	17579426	6e-16	87.9
TP89719	chr1H	98	50	1	0	1	50	17579475	17579426	6e-16	87.9
TP85054	chr1H	98.44	64	1	0	1	64	17877700	17877637	1e-23	113
TP32940	chr1H	98.44	64	1	0	1	64	17904219	17904282	1e-23	113
TP9891	chr1H	100	41	0	0	1	41	18079953	18079993	1e-12	76.8
TP66447	chr1H	100	64	0	0	1	64	19398047	19397984	2e-25	119
TP101029	chr1H	98.44	64	1	0	1	64	20205593	20205656	1e-23	113
TP46515	chr1H	98.44	64	1	0	1	64	20345910	20345847	1e-23	113
TP36005	chr1H	98.44	64	1	0	1	64	20346326	20346263	1e-23	113
TP45763-TP36876	chr1H	98.41	63	1	0	2	64	20894100	20894038	4e-23	111	QPlum.CW-1H
TP33472	chr1H	98.44	64	1	0	1	64	21024259	21024196	1e-23	113
TP91531	chr1H	96.88	64	2	0	1	64	21292761	21292824	5e-22	108
TP85740	chr1H	98.44	64	1	0	1	64	21609956	21610019	1e-23	113
TP28945	chr1H	100	64	0	0	1	64	21650354	21650417	2e-25	119
TP8316	chr1H	100	61	0	0	1	61	21678035	21678095	1e-23	113
TP75887	chr1H	98.44	64	1	0	1	64	21678038	21677975	1e-23	113
TP40828	chr1H	96.43	56	1	1	1	56	21714762	21714816	5e-17	91.6
TP45995	chr1H	100	61	0	0	1	61	21932075	21932135	1e-23	113
TP75026	chr1H	98.44	64	1	0	1	64	23050858	23050795	1e-23	113
TP99900	chr1H	98.04	51	1	0	1	51	23224472	23224522	2e-16	89.8
TP94757	chr1H	100	44	0	0	1	44	24637846	24637889	3e-14	82.4
TP30941	chr1H	100	64	0	0	1	64	25537420	25537483	2e-25	119
TP41466	chr1H	100	64	0	0	1	64	25985364	25985301	2e-25	119
TP76637	chr1H	100	64	0	0	1	64	26713806	26713869	2e-25	119
TP36876	chr1H	100	64	0	0	1	64	29069646	29069583	2e-25	119
TP57178	chr1H	100	64	0	0	1	64	29360096	29360159	2e-25	119
TP44270	chr1H	100	42	0	0	1	42	29583521	29583480	4e-13	78.7
TP61210	chr1H	100	64	0	0	1	64	29810024	29810087	2e-25	119
TP46053	chr1H	100	64	0	0	1	64	29810027	29809964	2e-25	119
TP2411	chr1H	100	64	0	0	1	64	33270862	33270799	2e-25	119
TP53946	chr1H	100	64	0	0	1	64	33334610	33334547	2e-25	119
TP23037	chr1H	100	64	0	0	1	64	40029923	40029860	2e-25	119
TP46358	chr1H	100	43	0	0	1	43	44244557	44244515	1e-13	80.5
TP49590	chr1H	100	46	0	0	1	46	46967497	46967452	2e-15	86.1
TP10795	chr1H	100	64	0	0	1	64	50763782	50763719	2e-25	119
TP36696	chr1H	95.31	64	0	3	1	63	52298530	52298591	3e-19	99
TP43608	chr1H	100	64	0	0	1	64	53377266	53377203	2e-25	119
TP50534	chr1H	100	64	0	0	1	64	61130762	61130699	2e-25	119
TP9383	chr1H	100	64	0	0	1	64	65996547	65996610	2e-25	119
TP31447	chr1H	98.36	61	1	0	1	61	66953088	66953028	5e-22	108
TP21572	chr1H	96.77	62	2	0	1	62	67767170	67767109	6e-21	104
TP10693	chr1H	98.44	64	1	0	1	64	74545185	74545248	1e-23	113
TP44294	chr1H	98.31	59	0	1	1	59	75708908	75708965	2e-20	102
TP82930	chr1H	98.44	64	1	0	1	64	75998207	75998144	1e-23	113
TP25576	chr1H	98.44	64	1	0	1	64	76594138	76594201	1e-23	113
TP101546	chr1H	100	52	0	0	1	52	76990410	76990359	1e-18	97.1
TP23606	chr1H	100	64	0	0	1	64	78644050	78644113	2e-25	119
TP29593	chr1H	98.44	64	1	0	1	64	80265063	80265000	1e-23	113
TP96102	chr1H	100	64	0	0	1	64	83406083	83406020	2e-25	119
TP84288	chr1H	100	64	0	0	1	64	87119720	87119657	2e-25	119
TP72155	chr1H	100	61	0	0	1	61	94904324	94904384	1e-23	113
TP23982	chr1H	100	64	0	0	1	64	102851504	102851441	2e-25	119
TP71302	chr1H	98.44	64	1	0	1	64	103978913	103978976	1e-23	113
TP52563	chr1H	100	52	0	0	1	52	104932885	104932834	1e-18	97.1
TP92695	chr1H	100	64	0	0	1	64	108240912	108240849	2e-25	119
TP90778	chr1H	100	63	0	0	1	63	123432088	123432026	8e-25	117
TP57861	chr1H	100	52	0	0	1	52	130502862	130502913	1e-18	97.1
TP83147	chr1H	100	37	0	0	1	37	130661230	130661194	2e-10	69.4
TP68671	chr1H	100	61	0	0	1	61	138530206	138530146	1e-23	113
TP39734	chr1H	96.55	58	1	1	1	57	152536103	152536046	4e-18	95.3
TP98861	chr1H	100	64	0	0	1	64	156255753	156255816	2e-25	119
TP69787	chr1H	100	62	0	0	1	62	166850031	166849970	3e-24	115
TP64210	chr1H	100	64	0	0	1	64	170096440	170096377	2e-25	119
TP50479	chr1H	100	44	0	0	1	44	172973782	172973739	3e-14	82.4
TP31527	chr1H	100	64	0	0	1	64	178392672	178392609	2e-25	119
TP4158	chr1H	98.44	64	1	0	1	64	179454278	179454341	1e-23	113
TP63334	chr1H	100	62	0	0	1	62	184287446	184287507	3e-24	115
TP36691	chr1H	100	42	0	0	1	42	185335245	185335204	4e-13	78.7
TP98033	chr1H	98.44	64	1	0	1	64	189838094	189838157	1e-23	113
TP20583	chr1H	100	64	0	0	1	64	202430153	202430090	2e-25	119
TP39447	chr1H	100	61	0	0	1	61	217559738	217559798	1e-23	113
TP24500	chr1H	100	64	0	0	1	64	220357522	220357459	2e-25	119
TP45505	chr1H	97.92	48	1	0	1	48	226414725	226414772	8e-15	84.2
TP64208	chr1H	100	61	0	0	1	61	237657232	237657292	1e-23	113
TP58696	chr1H	100	61	0	0	1	61	240484111	240484171	1e-23	113
TP88667	chr1H	100	64	0	0	1	64	241067447	241067384	2e-25	119
TP70264	chr1H	100	64	0	0	1	64	244975012	244975075	2e-25	119
TP87660	chr1H	100	62	0	0	1	62	248068129	248068068	3e-24	115
TP39395	chr1H	100	62	0	0	1	62	254966704	254966765	3e-24	115
TP19568	chr1H	100	43	0	0	1	43	257908995	257909037	1e-13	80.5
TP46300	chr1H	98.04	51	1	0	1	51	275293624	275293574	2e-16	89.8
TP33198	chr1H	100	52	0	0	1	52	280004898	280004847	1e-18	97.1
TP33225	chr1H	100	64	0	0	1	64	287150644	287150581	2e-25	119
TP55937	chr1H	100	64	0	0	1	64	289434019	289433956	2e-25	119
TP101208	chr1H	98.44	64	1	0	1	64	290130927	290130990	1e-23	113
TP22256	chr1H	100	61	0	0	1	61	299159786	299159846	1e-23	113
TP61684	chr1H	100	64	0	0	1	64	313231481	313231544	2e-25	119
TP48330	chr1H	96.83	63	2	0	1	63	317853450	317853388	2e-21	106
TP53576	chr1H	100	64	0	0	1	64	321750014	321750077	2e-25	119
TP91593	chr1H	100	64	0	0	1	64	324452024	324452087	2e-25	119
TP90634	chr1H	100	61	0	0	1	61	325182853	325182913	1e-23	113
TP97174	chr1H	98.33	60	1	0	1	60	342230044	342230103	2e-21	106
TP6106	chr1H	98.39	62	1	0	3	64	343034728	343034789	1e-22	110
TP40723	chr1H	100	44	0	0	1	44	344885034	344885077	3e-14	82.4
TP71374	chr1H	100	54	0	0	1	54	346181062	346181115	8e-20	100
TP10080	chr1H	100	64	0	0	1	64	346189501	346189438	2e-25	119
TP9110	chr1H	98.44	64	1	0	1	64	346195922	346195859	1e-23	113
TP98149	chr1H	98.44	64	1	0	1	64	346604048	346603985	1e-23	113
TP77771	chr1H	100	64	0	0	1	64	347387349	347387286	2e-25	119
TP56208	chr1H	100	64	0	0	1	64	347389796	347389733	2e-25	119
TP544	chr1H	100	64	0	0	1	64	347700167	347700230	2e-25	119
TP5755	chr1H	98.44	64	1	0	1	64	348209727	348209790	1e-23	113
TP17732	chr1H	98.44	64	1	0	1	64	349285429	349285492	1e-23	113
TP95993	chr1H	100	64	0	0	1	64	349488604	349488667	2e-25	119
TP64387	chr1H	100	63	0	0	1	63	353959507	353959569	8e-25	117
TP98350	chr1H	98.44	64	1	0	1	64	353966629	353966566	1e-23	113
TP17792	chr1H	98.44	64	1	0	1	64	354319190	354319253	1e-23	113
TP24486	chr1H	100	64	0	0	1	64	354799750	354799687	2e-25	119
TP96569	chr1H	100	64	0	0	1	64	357000403	357000466	2e-25	119
TP8511	chr1H	98.44	64	1	0	1	64	357685866	357685803	1e-23	113
TP13744	chr1H	100	64	0	0	1	64	358152716	358152779	2e-25	119
TP93818	chr1H	100	64	0	0	1	64	361650883	361650820	2e-25	119
TP9602	chr1H	100	64	0	0	1	64	361780375	361780312	2e-25	119
TP7277	chr1H	98.44	64	1	0	1	64	362986976	362987039	1e-23	113
TP37948	chr1H	98.44	64	1	0	1	64	364075584	364075521	1e-23	113
TP66329	chr1H	98.08	52	1	0	1	52	364405934	364405883	5e-17	91.6
TP89519	chr1H	100	60	0	0	1	60	364496270	364496211	4e-23	111
TP66412	chr1H	98.44	64	1	0	1	64	364657706	364657643	1e-23	113
TP77604	chr1H	100	64	0	0	1	64	365007529	365007466	2e-25	119
TP4937	chr1H	100	64	0	0	1	64	365275023	365274960	2e-25	119
TP39489	chr1H	100	46	0	0	1	46	368317612	368317657	2e-15	86.1
TP26975	chr1H	98.44	64	1	0	1	64	368761369	368761306	1e-23	113
TP66497	chr1H	92.98	57	4	0	1	57	369451806	369451750	8e-15	84.2
TP86839	chr1H	100	38	0	0	1	38	374654987	374654950	6e-11	71.3
TP60001	chr1H	100	36	0	0	1	36	376532637	376532602	8e-10	67.6
TP97189	chr1H	100	64	0	0	1	64	377073292	377073229	2e-25	119
TP6266	chr1H	100	64	0	0	1	64	378437726	378437789	2e-25	119
TP76120	chr1H	98.44	64	1	0	1	64	378568001	378567938	1e-23	113
TP26897	chr1H	100	48	0	0	1	48	379458712	379458759	2e-16	89.8
TP49091	chr1H	98.44	64	1	0	1	64	379645783	379645720	1e-23	113
TP56308	chr1H	100	64	0	0	1	64	380417039	380416976	2e-25	119
TP95712	chr1H	98.44	64	1	0	1	64	381208398	381208461	1e-23	113
TP18646	chr1H	100	52	0	0	1	52	382136545	382136596	1e-18	97.1
TP18647	chr1H	100	52	0	0	1	52	382136545	382136596	1e-18	97.1
TP9098	chr1H	98.44	64	1	0	1	64	383217460	383217523	1e-23	113
TP75764	chr1H	98.25	57	1	0	1	57	384188093	384188149	8e-20	100
TP877	chr1H	100	64	0	0	1	64	385455215	385455278	2e-25	119
TP49744	chr1H	98.44	64	1	0	1	64	385977681	385977744	1e-23	113
TP5832	chr1H	98.44	64	1	0	1	64	386189932	386189869	1e-23	113
TP50587	chr1H	98.44	64	1	0	1	64	386664222	386664285	1e-23	113
TP94086	chr1H	98	50	1	0	1	50	387194261	387194310	6e-16	87.9
TP94087	chr1H	98	50	1	0	1	50	387194261	387194310	6e-16	87.9
TP92316	chr1H	98.44	64	1	0	1	64	387194264	387194201	1e-23	113
TP57669	chr1H	100	55	0	0	1	55	388628205	388628151	2e-20	102
TP39708	chr1H	100	64	0	0	1	64	388968368	388968431	2e-25	119
TP37175	chr1H	98.44	64	1	0	1	64	388969648	388969585	1e-23	113
TP97933	chr1H	98.44	64	1	0	1	64	390254709	390254772	1e-23	113
TP63893	chr1H	98.36	61	1	0	1	61	390795975	390795915	5e-22	108
TP20408	chr1H	98.44	64	1	0	1	64	391255909	391255972	1e-23	113
TP48701	chr1H	98.44	64	1	0	1	64	391562030	391561967	1e-23	113
TP92881	chr1H	98.36	61	1	0	1	61	391566647	391566707	5e-22	108
TP24035	chr1H	100	64	0	0	1	64	393448815	393448878	2e-25	119
TP39257	chr1H	100	64	0	0	1	64	394163817	394163754	2e-25	119
TP32958	chr1H	100	64	0	0	1	64	397865171	397865108	2e-25	119
TP53974	chr1H	100	64	0	0	1	64	411429464	411429527	2e-25	119
TP8579	chr1H	98.44	64	1	0	1	64	414865883	414865820	1e-23	113
TP1706	chr1H	100	64	0	0	1	64	423466154	423466091	2e-25	119
TP53910	chr1H	100	64	0	0	1	64	434930210	434930147	2e-25	119
TP52031	chr1H	98.04	51	0	1	1	51	443440212	443440261	6e-16	87.9
TP47788	chr1H	100	46	0	0	1	46	443518678	443518633	2e-15	86.1
TP964	chr1H	98.44	64	1	0	1	64	444157269	444157332	1e-23	113
TP4915	chr1H	97.37	38	1	0	1	38	444162711	444162748	3e-09	65.8
TP59762	chr1H	98.44	64	1	0	1	64	447579984	447579921	1e-23	113
TP94947	chr1H	100	64	0	0	1	64	451121248	451121185	2e-25	119
TP47439	chr1H	98.44	64	1	0	1	64	451299248	451299185	1e-23	113
TP50125	chr1H	100	64	0	0	1	64	451890652	451890589	2e-25	119
TP82931	chr1H	100	64	0	0	1	64	452940064	452940001	2e-25	119
TP32089	chr1H	100	62	0	0	1	62	455656059	455656120	3e-24	115
TP29884	chr1H	97.3	37	1	0	23	59	458098351	458098315	1e-08	63.9
TP57338	chr1H	98.44	64	1	0	1	64	461093346	461093283	1e-23	113
TP90983	chr1H	98.39	62	1	0	1	62	462903209	462903270	1e-22	110
TP96998	chr1H	98.44	64	1	0	1	64	463012684	463012747	1e-23	113
TP34926	chr1H	100	64	0	0	1	64	463628660	463628597	2e-25	119
TP95222	chr1H	100	56	0	0	1	56	469660661	469660716	6e-21	104
TP85852	chr1H	100	64	0	0	1	64	470254146	470254209	2e-25	119
TP98904	chr1H	98.44	64	1	0	1	64	470270543	470270480	1e-23	113
TP57709	chr1H	98.44	64	1	0	1	64	471475578	471475515	1e-23	113
TP77036	chr1H	98.44	64	1	0	1	64	471792221	471792284	1e-23	113
TP22468	chr1H	98.44	64	1	0	1	64	472949592	472949655	1e-23	113
TP8059	chr1H	100	64	0	0	1	64	473860848	473860911	2e-25	119
TP12043	chr1H	98.44	64	1	0	1	64	473879936	473879999	1e-23	113
TP60572	chr1H	96.88	64	2	0	1	64	473880561	473880624	5e-22	108
TP7438	chr1H	97.92	48	1	0	1	48	473927336	473927289	8e-15	84.2
TP34225	chr1H	100	64	0	0	1	64	473927578	473927515	2e-25	119
TP62850	chr1H	100	64	0	0	1	64	474011581	474011518	2e-25	119
TP3757	chr1H	97.83	46	1	0	1	46	475056037	475056082	1e-13	80.5
TP73071	chr1H	100	64	0	0	1	64	475056040	475055977	2e-25	119
TP40029	chr1H	98.44	64	1	0	1	64	476758604	476758667	1e-23	113
TP26886	chr1H	100	48	0	0	1	48	478256986	478257033	2e-16	89.8
TP41689	chr1H	100	64	0	0	1	64	478955127	478955190	2e-25	119
TP24103	chr1H	100	64	0	0	1	64	482835990	482835927	2e-25	119
TP85347	chr1H	98.44	64	1	0	1	64	482842632	482842569	1e-23	113
TP41020	chr1H	98.44	64	1	0	1	64	483290148	483290211	1e-23	113
TP58537	chr1H	98.44	64	1	0	1	64	483524838	483524901	1e-23	113
TP51913	chr1H	100	60	0	0	1	60	484019878	484019937	4e-23	111
TP100173	chr1H	98.44	64	1	0	1	64	484325038	484325101	1e-23	113
TP14074	chr1H	98.44	64	1	0	1	64	484367339	484367276	1e-23	113
TP102460	chr1H	98.44	64	1	0	1	64	484379225	484379162	1e-23	113
TP64446	chr1H	100	64	0	0	1	64	484596655	484596718	2e-25	119
TP74143	chr1H	98.44	64	1	0	1	64	488017328	488017265	1e-23	113
TP46555	chr1H	98.44	64	1	0	1	64	488658454	488658517	1e-23	113
TP51118	chr1H	100	38	0	0	1	38	488678030	488678067	6e-11	71.3
TP6758	chr1H	98.44	64	1	0	1	64	488685519	488685456	1e-23	113
TP95678	chr1H	98.44	64	1	0	1	64	489291028	489290965	1e-23	113
TP46721	chr1H	100	64	0	0	1	64	489909912	489909975	2e-25	119
TP5282	chr1H	100	64	0	0	1	64	490369600	490369537	2e-25	119
TP47792	chr1H	98.44	64	1	0	1	64	490780545	490780482	1e-23	113
TP71678	chr1H	97.67	43	1	0	1	43	491801458	491801500	5e-12	75
TP88468	chr1H	100	64	0	0	1	64	492200013	492200076	2e-25	119
TP64811	chr1H	98.11	53	1	0	1	53	492206627	492206575	1e-17	93.5
TP77391	chr1H	98.44	64	1	0	1	64	492213992	492214055	1e-23	113
TP61183	chr1H	98.44	64	1	0	1	64	492407430	492407493	1e-23	113
TP37555	chr1H	100	64	0	0	1	64	492697950	492697887	2e-25	119
TP88411	chr1H	100	64	0	0	1	64	492949468	492949405	2e-25	119
TP53672	chr1H	100	64	0	0	1	64	493213137	493213200	2e-25	119
TP99166	chr1H	100	64	0	0	1	64	493213880	493213817	2e-25	119
TP52560	chr1H	98.44	64	1	0	1	64	493612331	493612268	1e-23	113
TP54485	chr1H	96.61	59	1	1	1	58	496200724	496200782	1e-18	97.1
TP59307	chr1H	98.44	64	1	0	1	64	496276569	496276506	1e-23	113
TP83220	chr1H	98.44	64	1	0	1	64	496437255	496437318	1e-23	113
TP48772	chr1H	98.36	61	1	0	4	64	496630614	496630674	5e-22	108
TP73993	chr1H	100	39	0	0	1	39	496667798	496667836	2e-11	73.1
TP71246	chr1H	98.44	64	1	0	1	64	498117008	498116945	1e-23	113
TP86241	chr1H	98.44	64	1	0	1	64	498665592	498665529	1e-23	113
TP102648	chr1H	100	64	0	0	1	64	498710050	498710113	2e-25	119
TP40861	chr1H	100	64	0	0	1	64	499548561	499548624	2e-25	119
TP40551	chr1H	100	44	0	0	1	44	499681205	499681162	3e-14	82.4
TP8909	chr1H	98.44	64	1	0	1	64	499681376	499681439	1e-23	113
TP87531	chr1H	100	64	0	0	1	64	500132497	500132560	2e-25	119
TP91469	chr1H	98.44	64	1	0	1	64	500899291	500899354	1e-23	113
TP18599	chr1H	96.49	57	1	1	1	57	501624002	501623947	1e-17	93.5
TP71900	chr1H	100	64	0	0	1	64	501970546	501970483	2e-25	119
TP60988	chr1H	98.44	64	1	0	1	64	501990730	501990667	1e-23	113
TP81962	chr1H	98.44	64	1	0	1	64	502081982	502082045	1e-23	113
TP53384	chr1H	100	57	0	0	1	57	503256597	503256541	2e-21	106
TP30486	chr1H	100	62	0	0	1	62	503284386	503284447	3e-24	115
TP1285	chr1H	98.28	58	1	0	1	58	503374659	503374602	2e-20	102
TP25619	chr1H	100	64	0	0	1	64	503511021	503511084	2e-25	119
TP80641	chr1H	98.44	64	1	0	1	64	503654120	503654183	1e-23	113
TP85925	chr1H	98.44	64	1	0	1	64	503691820	503691757	1e-23	113
TP14718	chr1H	100	50	0	0	1	50	504460117	504460068	1e-17	93.5
TP2327	chr1H	100	55	0	0	1	55	504474487	504474541	2e-20	102
TP27349	chr1H	100	64	0	0	1	64	504801427	504801364	2e-25	119
TP10783	chr1H	100	61	0	0	1	61	505151662	505151722	1e-23	113
TP44886	chr1H	98.44	64	1	0	1	64	505464218	505464281	1e-23	113
TP39024	chr1H	100	64	0	0	1	64	505464221	505464158	2e-25	119
TP57688	chr1H	100	55	0	0	1	55	506347661	506347715	2e-20	102
TP2705	chr1H	98.44	64	1	0	1	64	506610080	506610017	1e-23	113
TP61869	chr1H	100	64	0	0	1	64	507147484	507147421	2e-25	119
TP51973	chr1H	100	64	0	0	1	64	507203218	507203281	2e-25	119
TP93805	chr1H	100	64	0	0	1	64	507630341	507630404	2e-25	119
TP8485	chr1H	100	64	0	0	1	64	507630344	507630281	2e-25	119
TP47618	chr1H	100	47	0	0	1	47	507896162	507896208	6e-16	87.9
TP24755	chr1H	100	62	0	0	1	62	507897036	507897097	3e-24	115
TP35714	chr1H	100	64	0	0	1	64	508313251	508313314	2e-25	119
TP49924	chr1H	98.11	53	1	0	1	53	508567384	508567436	1e-17	93.5
TP86423	chr1H	98.44	64	1	0	1	64	509274973	509274910	1e-23	113
TP59712	chr1H	96.88	64	2	0	1	64	509404711	509404648	5e-22	108
TP86757	chr1H	100	64	0	0	1	64	509973555	509973618	2e-25	119
TP39603	chr1H	96.88	64	2	0	1	64	510044556	510044493	5e-22	108
TP65704	chr1H	100	62	0	0	1	62	510800025	510800086	3e-24	115
TP3001	chr1H	96.88	64	2	0	1	64	511484812	511484875	5e-22	108
TP68074	chr1H	98.44	64	1	0	1	64	511553528	511553465	1e-23	113
TP84931	chr1H	98.15	54	1	0	1	54	511923200	511923147	4e-18	95.3
TP24070	chr1H	100	45	0	0	1	45	511923344	511923300	8e-15	84.2
TP76393	chr1H	100	64	0	0	1	64	512392499	512392436	2e-25	119
TP31248	chr1H	97.92	48	1	0	1	48	512565761	512565808	8e-15	84.2
TP43397	chr1H	100	49	0	0	1	49	512675544	512675496	5e-17	91.6	QYld.FW-1H
TP55113	chr1H	98.44	64	1	0	1	64	512846248	512846311	1e-23	113
TP22513	chr1H	100	44	0	0	1	44	512846251	512846208	3e-14	82.4
TP54962	chr1H	100	64	0	0	1	64	512965571	512965634	2e-25	119
TP2141	chr1H	100	46	0	0	1	46	513076766	513076811	2e-15	86.1
TP73892	chr1H	98.44	64	1	0	1	64	513079922	513079859	1e-23	113
TP60935	chr1H	98.44	64	1	0	1	64	513139384	513139321	1e-23	113
TP3459	chr1H	98.44	64	1	0	1	64	513142398	513142335	1e-23	113
TP71010	chr1H	100	64	0	0	1	64	513273703	513273766	2e-25	119
TP96777	chr1H	100	64	0	0	1	64	513633669	513633606	2e-25	119
TP82025	chr1H	98.44	64	1	0	1	64	513643745	513643682	1e-23	113
TP499	chr1H	100	60	0	0	5	64	514066293	514066352	4e-23	111
TP32504	chr1H	100	38	0	0	1	38	514397172	514397135	6e-11	71.3
TP46667	chr1H	98.44	64	1	0	1	64	515566938	515567001	1e-23	113
TP16197	chr1H	100	64	0	0	1	64	515694628	515694691	2e-25	119
TP85390	chr1H	100	61	0	0	1	61	516113164	516113224	1e-23	113
TP85889	chr1H	100	39	0	0	1	39	516115231	516115269	2e-11	73.1	QMat.FW-1H
TP62899	chr1H	98.25	57	1	0	1	57	516115234	516115178	8e-20	100
TP24880	chr1H	100	64	0	0	1	64	516131493	516131430	2e-25	119
TP92933	chr1H	98.44	64	1	0	1	64	516269144	516269081	1e-23	113
TP39887	chr1H	100	64	0	0	1	64	516737392	516737329	2e-25	119
TP18732	chr1H	100	64	0	0	1	64	516792562	516792499	2e-25	119
TP21369	chr1H	100	64	0	0	1	64	517738695	517738632	2e-25	119
TP64473	chr1H	98.39	62	1	0	1	62	517978589	517978528	1e-22	110
TP89087	chr1H	98.44	64	1	0	1	64	517978842	517978779	1e-23	113
TP22604	chr1H	100	64	0	0	1	64	518169956	518170019	2e-25	119
TP83301	chr1H	98.44	64	1	0	1	64	518556837	518556900	1e-23	113
TP84560	chr1H	100	64	0	0	1	64	518958688	518958751	2e-25	119
TP84506	chr1H	100	64	0	0	1	64	518986015	518986078	2e-25	119
TP69674	chr1H	100	64	0	0	1	64	518986364	518986427	2e-25	119
TP83411	chr1H	98.44	64	1	0	1	64	519018350	519018413	1e-23	113
TP33580	chr1H	98.39	62	1	0	1	62	519071855	519071794	1e-22	110
TP33488	chr1H	98.44	64	1	0	1	64	519072113	519072050	1e-23	113
TP88262	chr1H	98.44	64	1	0	1	64	519110298	519110361	1e-23	113
TP102205	chr1H	100	56	0	0	1	56	519185674	519185729	6e-21	104
TP82880	chr1H	100	40	0	0	1	40	519755648	519755687	5e-12	75
TP49739	chr1H	98.44	64	1	0	1	64	519770368	519770431	1e-23	113
TP92449	chr1H	98.44	64	1	0	1	64	519771259	519771196	1e-23	113
TP91105	chr1H	100	58	0	0	1	58	520571227	520571284	5e-22	108
TP78271	chr1H	100	59	0	0	1	59	521582043	521581985	1e-22	110
TP93659	chr1H	100	64	0	0	1	64	523427938	523428001	2e-25	119
TP94974	chr1H	100	61	0	0	1	61	523965216	523965276	1e-23	113
TP45485	chr1H	98.44	64	1	0	1	64	525465290	525465353	1e-23	113
TP6339	chr1H	100	44	0	0	1	44	525477781	525477824	3e-14	82.4
TP39091	chr1H	100	51	0	0	1	51	525537141	525537191	4e-18	95.3
TP98622	chr1H	100	64	0	0	1	64	525966210	525966147	2e-25	119
TP34361	chr1H	98.44	64	1	0	1	64	526172945	526173008	1e-23	113
TP55000	chr1H	100	43	0	0	1	43	526174129	526174171	1e-13	80.5
TP68757	chr1H	98.44	64	1	0	1	64	526602398	526602461	1e-23	113
TP36992	chr1H	100	64	0	0	1	64	527651398	527651461	2e-25	119
TP2678	chr1H	100	53	0	0	1	53	527952921	527952869	3e-19	99
TP93675	chr1H	98.44	64	1	0	1	64	527979949	527979886	1e-23	113
TP59054	chr1H	98.33	60	1	0	1	60	528117648	528117707	2e-21	106
TP9534	chr1H	100	61	0	0	1	61	528149130	528149190	1e-23	113
TP50848	chr1H	96.88	64	2	0	1	64	528256643	528256580	5e-22	108
TP23171	chr1H	100	64	0	0	1	64	528275850	528275787	2e-25	119
TP99610	chr1H	100	63	0	0	1	63	528472587	528472649	8e-25	117
TP49738	chr1H	98.44	64	1	0	1	64	528878444	528878507	1e-23	113
TP8180	chr1H	100	42	0	0	1	42	528880040	528880081	4e-13	78.7
TP3405	chr1H	98.44	64	1	0	1	64	528988793	528988856	1e-23	113
TP52413	chr1H	98.44	64	1	0	1	64	528992135	528992198	1e-23	113
TP61070	chr1H	100	64	0	0	1	64	528992138	528992075	2e-25	119
TP62039	chr1H	98.44	64	1	0	1	64	529404822	529404885	1e-23	113
TP90534	chr1H	98.44	64	1	0	1	64	529975542	529975479	1e-23	113
TP52844	chr1H	98.44	64	1	0	1	64	530071712	530071649	1e-23	113
TP44999	chr1H	100	51	0	0	1	51	530233342	530233292	4e-18	95.3
TP86979	chr1H	98.44	64	1	0	1	64	530530582	530530519	1e-23	113
TP1885	chr1H	100	64	0	0	1	64	531234418	531234481	2e-25	119
TP87420	chr1H	100	43	0	0	1	43	531380367	531380325	1e-13	80.5
TP48003	chr1H	97.62	42	1	0	1	42	532251764	532251805	2e-11	73.1
TP46030	chr1H	98	50	1	0	1	50	532494044	532494093	6e-16	87.9
TP66040	chr1H	100	38	0	0	1	38	533795913	533795876	6e-11	71.3
TP37036	chr1H	98.44	64	1	0	1	64	533885730	533885793	1e-23	113
TP22737	chr1H	100	36	0	0	1	36	533911267	533911232	8e-10	67.6
TP87753	chr1H	98.44	64	1	0	1	64	533919390	533919453	1e-23	113
TP59663	chr1H	100	64	0	0	1	64	533932758	533932695	2e-25	119
TP11335	chr1H	98.46	65	0	1	1	64	534126461	534126525	1e-23	113
TP18518	chr1H	100	64	0	0	1	64	534190481	534190544	2e-25	119
TP77261	chr1H	98.44	64	1	0	1	64	534263606	534263669	1e-23	113
TP1445	chr1H	100	52	0	0	1	52	534653459	534653408	1e-18	97.1
TP50059	chr1H	98.21	56	0	1	1	56	534655856	534655802	1e-18	97.1
TP48915	chr1H	97.83	46	1	0	1	46	534718263	534718218	1e-13	80.5
TP1629	chr1H	100	64	0	0	1	64	535416520	535416457	2e-25	119
TP40374	chr1H	98.44	64	1	0	1	64	535509422	535509359	1e-23	113
TP65337	chr1H	98.44	64	1	0	1	64	535703618	535703681	1e-23	113
TP33988	chr1H	100	49	0	0	1	49	536100460	536100508	5e-17	91.6
TP27504	chr1H	97.73	44	1	0	1	44	536891023	536890980	1e-12	76.8
TP58343	chr1H	98.44	64	1	0	1	64	536998481	536998418	1e-23	113
TP60609	chr1H	100	64	0	0	1	64	537120010	537120073	2e-25	119
TP97422	chr1H	100	64	0	0	1	64	537356797	537356734	2e-25	119
TP52547	chr1H	98.44	64	1	0	1	64	537359881	537359944	1e-23	113
TP63177	chr1H	98.44	64	1	0	1	64	537929554	537929491	1e-23	113
TP82229	chr1H	100	64	0	0	1	64	538151355	538151292	2e-25	119
TP90192	chr1H	98.44	64	1	0	1	64	538167020	538166957	1e-23	113
TP94996	chr1H	100	64	0	0	1	64	538309464	538309401	2e-25	119
TP68807	chr1H	96.67	60	0	2	1	59	538409931	538409989	3e-19	99
TP10338	chr1H	100	64	0	0	1	64	538488531	538488594	2e-25	119
TP45779	chr1H	100	47	0	0	1	47	538497050	538497004	6e-16	87.9
TP13173	chr1H	98.44	64	1	0	1	64	538727114	538727051	1e-23	113
TP40535	chr1H	96.88	64	2	0	1	64	540283685	540283622	5e-22	108
TP59515	chr1H	94.87	39	2	0	4	42	540842569	540842607	4e-08	62.1
TP11329	chr1H	100	64	0	0	1	64	541149877	541149940	2e-25	119
TP49897	chr1H	100	64	0	0	1	64	541152284	541152221	2e-25	119
TP18610	chr1H	98.44	64	1	0	1	64	541255770	541255707	1e-23	113
TP75211	chr1H	100	64	0	0	1	64	541347612	541347675	2e-25	119
TP62671	chr1H	100	64	0	0	1	64	542932476	542932539	2e-25	119
TP75249	chr1H	100	64	0	0	1	64	544039485	544039422	2e-25	119
TP59396	chr1H	98.44	64	1	0	1	64	544591219	544591156	1e-23	113
TP93599	chr1H	98.44	64	1	0	1	64	544923130	544923067	1e-23	113
TP95665	chr1H	100	63	0	0	1	63	547254279	547254217	8e-25	117
TP3835	chr1H	100	63	0	0	1	63	547305017	547304955	8e-25	117
TP44761	chr1H	98.44	64	1	0	1	64	547683758	547683695	1e-23	113
TP11552	chr1H	100	64	0	0	1	64	547732242	547732305	2e-25	119
TP3524	chr1H	100	64	0	0	1	64	547777059	547777122	2e-25	119
TP74624	chr1H	98.21	56	1	0	1	56	548062597	548062542	3e-19	99
TP58514	chr1H	100	64	0	0	1	64	548173972	548174035	2e-25	119
TP7647	chr1H	100	59	0	0	1	59	548193772	548193830	1e-22	110
TP49107	chr1H	98.44	64	1	0	1	64	548195872	548195809	1e-23	113
TP25634	chr1H	98.44	64	1	0	1	64	548347442	548347379	1e-23	113
TP88287	chr1H	98.44	64	1	0	1	64	548366098	548366161	1e-23	113
TP4219	chr1H	100	64	0	0	1	64	548521181	548521118	2e-25	119
TP48719	chr1H	100	45	0	0	1	45	548882935	548882891	8e-15	84.2
TP92334-TP12227	chr1H	96.43	56	1	1	1	56	548912277	548912331	5e-17	91.6	QPlum.FW-1H
TP86978	chr1H	100	64	0	0	1	64	549000168	549000231	2e-25	119
TP3523	chr1H	98.44	64	1	0	1	64	549044961	549045024	1e-23	113
TP31105	chr1H	100	64	0	0	1	64	549126121	549126184	2e-25	119
TP91328	chr1H	98.44	64	1	0	1	64	549130158	549130095	1e-23	113
TP68301	chr1H	100	41	0	0	1	41	549133695	549133655	1e-12	76.8
TP93256	chr1H	100	49	0	0	1	49	549141130	549141178	5e-17	91.6
TP81772	chr1H	100	45	0	0	1	45	549277570	549277526	8e-15	84.2
TP29934	chr1H	100	64	0	0	1	64	549296941	549297004	2e-25	119
TP96440	chr1H	100	62	0	0	1	62	549429975	549429914	3e-24	115
TP60761	chr1H	100	49	0	0	1	49	550277948	550277996	5e-17	91.6
TP81557	chr1H	98.44	64	1	0	1	64	550544241	550544178	1e-23	113
TP12227	chr1H	100	64	0	0	1	64	551355857	551355920	2e-25	119
TP76826	chr1H	100	64	0	0	1	64	551384444	551384507	2e-25	119
TP94129	chr1H	100	64	0	0	1	64	551525555	551525492	2e-25	119
TP57042	chr1H	98.44	64	1	0	1	64	551612298	551612235	1e-23	113
TP73139	chr1H	96.88	64	2	0	1	64	551615451	551615388	5e-22	108
TP68091	chr1H	100	64	0	0	1	64	551700423	551700486	2e-25	119
TP3926	chr1H	100	55	0	0	1	55	551858720	551858774	2e-20	102
TP3927	chr1H	100	55	0	0	1	55	551858720	551858774	2e-20	102
TP57553	chr1H	100	64	0	0	1	64	551867028	551866965	2e-25	119
TP5231	chr1H	100	64	0	0	1	64	551867658	551867721	2e-25	119
TP26239	chr1H	97.62	42	1	0	1	42	552589494	552589453	2e-11	73.1
TP88458	chr1H	98.44	64	1	0	1	64	553477218	553477155	1e-23	113
TP56035	chr1H	90.48	63	6	0	2	64	553490300	553490362	8e-15	84.2
TP57419	chr1H	98.44	64	1	0	1	64	553491368	553491305	1e-23	113
TP88459	chr1H	100	64	0	0	1	64	553708679	553708742	2e-25	119
TP72602	chr1H	97.92	48	0	1	1	48	553906553	553906507	3e-14	82.4
TP28384	chr1H	98.44	64	1	0	1	64	554566884	554566947	1e-23	113
TP13560	chr1H	98.44	64	1	0	1	64	554781143	554781206	1e-23	113
TP102060	chr1H	100	64	0	0	1	64	555841307	555841370	2e-25	119
TP97789	chr1H	98.33	60	1	0	1	60	555847426	555847367	2e-21	106
TP39981	chr1H	100	64	0	0	1	64	555851481	555851418	2e-25	119
TP94044	chr1H	95.31	64	3	0	1	64	556044704	556044641	2e-20	102
TP29426	chr1H	100	61	0	0	1	61	556083685	556083745	1e-23	113
TP10203	chr1H	95.31	64	3	0	1	64	556084271	556084208	2e-20	102
TP37017	chr1H	100	64	0	0	1	64	556384428	556384491	2e-25	119
TP10514	chr1H	98.44	64	1	0	1	64	556394096	556394159	1e-23	113
TP51333	chr1H	98.44	64	1	0	1	64	556441168	556441231	1e-23	113	QSPAD.FW-1H
TP81573	chr1H	98.44	64	1	0	1	64	556832603	556832666	1e-23	113
TP19082	chr1H	98.44	64	1	0	1	64	556926587	556926524	1e-23	113
TP56204	chr2H	98.04	51	1	0	1	51	431358	431308	2e-16	89.8
TP80764	chr2H	100	64	0	0	1	64	669588	669651	2e-25	119
TP25190	chr2H	98.04	51	1	0	1	51	831991	831941	2e-16	89.8
TP87024	chr2H	100	57	0	0	1	57	926390	926334	2e-21	106
TP61052	chr2H	98.44	64	1	0	1	64	1185668	1185731	1e-23	113
TP67620	chr2H	98.44	64	1	0	1	64	1196117	1196180	1e-23	113
TP57142	chr2H	93.75	64	4	0	1	64	1373468	1373531	1e-18	97.1
TP1979	chr2H	94.44	54	2	1	3	55	1539158	1539211	3e-14	82.4
TP91755	chr2H	98.36	61	1	0	4	64	2145913	2145973	5e-22	108
TP39798	chr2H	100	63	0	0	1	63	2336769	2336707	8e-25	117
TP19804	chr2H	98.21	56	1	0	1	56	2765019	2764964	3e-19	99
TP25525	chr2H	98.44	64	1	0	1	64	2790912	2790975	1e-23	113
TP102304	chr2H	100	64	0	0	1	64	2790915	2790852	2e-25	119
TP72855	chr2H	98.04	51	1	0	1	51	2829289	2829239	2e-16	89.8
TP92068	chr2H	100	64	0	0	1	64	2929765	2929702	2e-25	119
TP22088	chr2H	98.44	64	1	0	1	64	2948363	2948426	1e-23	113
TP88970	chr2H	100	64	0	0	1	64	2960988	2960925	2e-25	119
TP67173	chr2H	100	64	0	0	1	64	3178903	3178840	2e-25	119
TP18086	chr2H	98.44	64	1	0	1	64	3238512	3238575	1e-23	113
TP24191	chr2H	100	64	0	0	1	64	3443650	3443587	2e-25	119
TP13470	chr2H	98.18	55	1	0	1	55	3482365	3482419	1e-18	97.1
TP8379	chr2H	98.44	64	1	0	1	64	4241909	4241972	1e-23	113
TP90174	chr2H	100	64	0	0	1	64	4461938	4462001	2e-25	119
TP82901	chr2H	100	56	0	0	1	56	4462780	4462725	6e-21	104
TP81889	chr2H	98.44	64	1	0	1	64	4547748	4547811	1e-23	113
TP3123	chr2H	98.44	64	1	0	1	64	5691763	5691826	1e-23	113	QLwax.CF-2H
TP81341	chr2H	98.44	64	1	0	1	64	5952925	5952862	1e-23	113
TP37050	chr2H	100	62	0	0	3	64	6022211	6022272	3e-24	115
TP45309	chr2H	98.46	65	0	1	1	64	6341925	6341989	1e-23	113
TP100545	chr2H	98.44	64	1	0	1	64	6479188	6479251	1e-23	113
TP95312	chr2H	98.44	64	1	0	1	64	6505570	6505633	1e-23	113
TP62757	chr2H	100	57	0	0	8	64	6553452	6553508	2e-21	106
TP21472	chr2H	100	63	0	0	1	63	6687089	6687027	8e-25	117
TP40752	chr2H	100	64	0	0	1	64	6817964	6818027	2e-25	119
TP69602	chr2H	96.88	64	2	0	1	64	7574995	7574932	5e-22	108
TP37260	chr2H	96.88	64	2	0	1	64	8677556	8677619	5e-22	108
TP24883	chr2H	100	63	0	0	1	63	8697185	8697247	8e-25	117
TP36351	chr2H	100	64	0	0	1	64	8788956	8789019	2e-25	119
TP71809	chr2H	100	64	0	0	1	64	8905809	8905746	2e-25	119
TP57817	chr2H	100	64	0	0	1	64	8906836	8906899	2e-25	119
TP82421	chr2H	100	64	0	0	1	64	8906839	8906776	2e-25	119
TP59066	chr2H	96.88	64	2	0	1	64	9291206	9291143	5e-22	108
TP1208	chr2H	93.33	45	3	0	12	56	9344939	9344895	8e-10	67.6
TP75572	chr2H	98.44	64	1	0	1	64	10043842	10043779	1e-23	113
TP14238	chr2H	100	56	0	0	1	56	10216375	10216430	6e-21	104
TP102632	chr2H	100	64	0	0	1	64	10220172	10220235	2e-25	119
TP76763	chr2H	98.41	63	1	0	1	63	10898721	10898659	4e-23	111
TP8653	chr2H	100	64	0	0	1	64	10954026	10954089	2e-25	119
TP95575	chr2H	96.88	64	2	0	1	64	10983367	10983304	5e-22	108
TP87921	chr2H	100	64	0	0	1	64	11004398	11004461	2e-25	119
TP42289	chr2H	95.35	43	2	0	1	43	11625631	11625673	2e-10	69.4
TP7429	chr2H	100	64	0	0	1	64	11898425	11898488	2e-25	119
TP69039	chr2H	98.44	64	1	0	1	64	12012805	12012742	1e-23	113
TP56813	chr2H	100	42	0	0	1	42	12121921	12121962	4e-13	78.7
TP71248	chr2H	98.36	61	1	0	1	61	12213973	12214033	5e-22	108
TP61600	chr2H	100	36	0	0	1	36	12325377	12325412	8e-10	67.6
TP61256	chr2H	100	43	0	0	1	43	12358103	12358145	1e-13	80.5
TP96531	chr2H	98.41	63	0	1	1	63	12868456	12868395	1e-22	110
TP20355	chr2H	100	64	0	0	1	64	13031044	13031107	2e-25	119
TP43101	chr2H	95.24	63	3	0	1	63	13090716	13090778	8e-20	100
TP31780	chr2H	96.15	52	2	0	1	52	13139911	13139860	2e-15	86.1
TP85745	chr2H	98.36	61	1	0	1	61	13249140	13249080	5e-22	108
TP57155	chr2H	98.44	64	1	0	1	64	13286253	13286316	1e-23	113
TP11265	chr2H	98.44	64	1	0	1	64	13925677	13925614	1e-23	113
TP53440	chr2H	100	64	0	0	1	64	14013097	14013034	2e-25	119
TP92116	chr2H	100	64	0	0	1	64	14052248	14052185	2e-25	119
TP23953	chr2H	98.44	64	1	0	1	64	14313814	14313751	1e-23	113
TP95698	chr2H	98.44	64	1	0	1	64	14724795	14724858	1e-23	113
TP22871	chr2H	100	64	0	0	1	64	14782674	14782737	2e-25	119
TP89986	chr2H	100	64	0	0	1	64	14986588	14986651	2e-25	119
TP98800	chr2H	98.44	64	1	0	1	64	15344711	15344774	1e-23	113
TP14223	chr2H	98.44	64	1	0	1	64	16421646	16421709	1e-23	113
TP82918	chr2H	100	64	0	0	1	64	16945977	16946040	2e-25	119
TP100636	chr2H	98.44	64	1	0	1	64	17049081	17049018	1e-23	113
TP100637	chr2H	98.44	64	1	0	1	64	17134247	17134310	1e-23	113
TP48328	chr2H	96.88	64	2	0	1	64	17182148	17182085	5e-22	108
TP32985	chr2H	98.44	64	1	0	1	64	18287151	18287214	1e-23	113
TP34627	chr2H	98.44	64	1	0	1	64	18689028	18688965	1e-23	113
TP71685	chr2H	98.39	62	1	0	1	62	18905923	18905984	1e-22	110
TP58400	chr2H	96.88	64	2	0	1	64	18991273	18991210	5e-22	108
TP9068	chr2H	98.44	64	1	0	1	64	19193696	19193759	1e-23	113
TP64984	chr2H	100	59	0	0	1	59	19218129	19218071	1e-22	110
TP61959	chr2H	100	64	0	0	1	64	19351090	19351027	2e-25	119
TP55854	chr2H	96.88	64	2	0	1	64	19375734	19375797	5e-22	108
TP34737	chr2H	100	48	0	0	1	48	19468635	19468588	2e-16	89.8
TP39656	chr2H	100	64	0	0	1	64	19671395	19671332	2e-25	119
TP21595	chr2H	96.72	61	2	0	4	64	19686531	19686591	2e-20	102
TP39868	chr2H	100	39	0	0	1	39	20050958	20050920	2e-11	73.1
TP98099	chr2H	100	64	0	0	1	64	20087582	20087519	2e-25	119
TP84706	chr2H	97.14	35	1	0	5	39	21195286	21195252	1e-07	60.2
TP28425	chr2H	98.44	64	1	0	1	64	21324778	21324841	1e-23	113
TP101400	chr2H	98.44	64	1	0	1	64	21357621	21357684	1e-23	113
TP13111	chr2H	100	64	0	0	1	64	21376519	21376582	2e-25	119
TP2168	chr2H	100	64	0	0	1	64	21436631	21436568	2e-25	119
TP69628	chr2H	98.36	61	1	0	1	61	21532313	21532373	5e-22	108
TP55122	chr2H	98.28	58	1	0	1	58	21677419	21677476	2e-20	102
TP99423	chr2H	97.56	41	1	0	1	41	22303845	22303805	6e-11	71.3
TP30618	chr2H	98.44	64	1	0	1	64	22502183	22502246	1e-23	113
TP96887	chr2H	100	64	0	0	1	64	22687565	22687502	2e-25	119
TP42907	chr2H	98.44	64	1	0	1	64	22917311	22917248	1e-23	113
TP94734	chr2H	100	61	0	0	1	61	23117010	23117070	1e-23	113
TP97875	chr2H	98.28	58	1	0	1	58	23336403	23336346	2e-20	102
TP84271	chr2H	98.44	64	1	0	1	64	25750501	25750438	1e-23	113
TP55025	chr2H	100	64	0	0	1	64	26103255	26103318	2e-25	119
TP12582	chr2H	97.73	44	1	0	1	44	26309810	26309767	1e-12	76.8
TP83898	chr2H	97.62	42	1	0	1	42	26989456	26989497	2e-11	73.1
TP87668	chr2H	100	63	0	0	1	63	27273138	27273076	8e-25	117
TP82140	chr2H	98.44	64	1	0	1	64	27377053	27377116	1e-23	113
TP74972	chr2H	96.15	52	1	1	1	52	28277396	28277446	8e-15	84.2
TP40033	chr2H	100	64	0	0	1	64	28452658	28452595	2e-25	119
HvPPD1_104	chr2H	95.45	198	9	0	3	200	29123369	29123172	3e-89	333
TP68145	chr2H	98.44	64	1	0	1	64	29348624	29348687	1e-23	113
TP82796	chr2H	98.44	64	1	0	1	64	29447820	29447757	1e-23	113
TP16031	chr2H	98.44	64	1	0	1	64	29700951	29700888	1e-23	113
TP85476	chr2H	98.25	57	1	0	1	57	29881304	29881248	8e-20	100
TP13863	chr2H	98.44	64	1	0	1	64	30116913	30116976	1e-23	113
TP40989	chr2H	100	60	0	0	1	60	30171467	30171526	4e-23	111
TP66885	chr2H	100	64	0	0	1	64	30334277	30334214	2e-25	119
TP97812	chr2H	98.44	64	1	0	1	64	30509690	30509753	1e-23	113
TP72975	chr2H	96.08	51	0	2	1	50	31263826	31263777	3e-14	82.4
TP87870	chr2H	98.44	64	1	0	1	64	31462727	31462790	1e-23	113
TP58523	chr2H	98.11	53	1	0	1	53	31462730	31462678	1e-17	93.5
TP51636	chr2H	100	64	0	0	1	64	31560140	31560203	2e-25	119
TP26237	chr2H	100	41	0	0	1	41	32260239	32260199	1e-12	76.8
TP60038	chr2H	98.44	64	1	0	1	64	32337746	32337809	1e-23	113
TP91701	chr2H	95.08	61	3	0	1	61	32743198	32743258	1e-18	97.1
TP4912	chr2H	100	64	0	0	1	64	34092205	34092142	2e-25	119
TP27186	chr2H	90.63	64	5	1	1	64	34876040	34876102	8e-15	84.2
TP3806	chr2H	100	45	0	0	1	45	35066746	35066790	8e-15	84.2
TP77805	chr2H	98.44	64	1	0	1	64	35741990	35742053	1e-23	113
TP23152	chr2H	100	46	0	0	1	46	36331053	36331098	2e-15	86.1
TP27996	chr2H	100	64	0	0	1	64	36337462	36337399	2e-25	119
TP40475	chr2H	98.36	61	1	0	1	61	37222393	37222333	5e-22	108
TP84557	chr2H	100	64	0	0	1	64	37222495	37222432	2e-25	119
TP1274	chr2H	100	64	0	0	1	64	37558385	37558448	2e-25	119
TP100523	chr2H	98.44	64	1	0	1	64	38195126	38195063	1e-23	113
TP66919	chr2H	98.44	64	1	0	1	64	38372984	38373047	1e-23	113
TP12921	chr2H	98.44	64	1	0	1	64	38603000	38602937	1e-23	113
TP12005	chr2H	98.39	62	1	0	3	64	40242167	40242106	1e-22	110
TP45288	chr2H	100	64	0	0	1	64	42549954	42549891	2e-25	119
TP84322	chr2H	98.41	63	1	0	1	63	45108516	45108578	4e-23	111
TP97670	chr2H	98.44	64	1	0	1	64	45351680	45351743	1e-23	113
TP3559	chr2H	100	41	0	0	1	41	45497347	45497387	1e-12	76.8
TP63651	chr2H	100	64	0	0	1	64	45577820	45577757	2e-25	119
TP89243	chr2H	100	64	0	0	1	64	46813335	46813272	2e-25	119
TP17334	chr2H	98.44	64	1	0	1	64	46833552	46833489	1e-23	113
TP20253	chr2H	97.83	46	1	0	1	46	47291611	47291566	1e-13	80.5
TP102171	chr2H	100	64	0	0	1	64	47309184	47309247	2e-25	119
TP54274	chr2H	98.44	64	1	0	1	64	47836059	47835996	1e-23	113
TP18970	chr2H	100	64	0	0	1	64	49651039	49651102	2e-25	119
TP88653	chr2H	96.67	60	2	0	1	60	52688029	52687970	8e-20	100
TP57606	chr2H	98.44	64	1	0	1	64	52929338	52929275	1e-23	113
TP99190	chr2H	100	62	0	0	1	62	53710236	53710175	3e-24	115
TP91992	chr2H	100	64	0	0	1	64	53908435	53908372	2e-25	119
TP38571	chr2H	100	63	0	0	1	63	54263784	54263846	8e-25	117
TP16963	chr2H	100	63	0	0	1	63	54576851	54576789	8e-25	117
TP790	chr2H	100	48	0	0	1	48	54578585	54578632	2e-16	89.8
TP64436	chr2H	100	64	0	0	1	64	54754889	54754826	2e-25	119
TP12491	chr2H	100	64	0	0	1	64	55705555	55705618	2e-25	119
TP75030	chr2H	98.44	64	1	0	1	64	55705760	55705823	1e-23	113
TP93984	chr2H	96.88	64	2	0	1	64	55776005	55776068	5e-22	108
TP102407	chr2H	100	64	0	0	1	64	56518256	56518319	2e-25	119
TP68847	chr2H	98.44	64	1	0	1	64	56713238	56713175	1e-23	113
TP52085	chr2H	98.44	64	1	0	1	64	57273495	57273432	1e-23	113
TP1837	chr2H	100	64	0	0	1	64	57663399	57663336	2e-25	119
TP87972	chr2H	100	48	0	0	3	50	58537067	58537020	2e-16	89.8
TP99209	chr2H	100	54	0	0	1	54	58605615	58605562	8e-20	100
TP99210	chr2H	100	54	0	0	1	54	58605615	58605562	8e-20	100
TP100283	chr2H	98.36	61	1	0	1	61	59213865	59213925	5e-22	108
TP7750	chr2H	100	46	0	0	1	46	61091363	61091318	2e-15	86.1
TP3031	chr2H	100	64	0	0	1	64	62895285	62895222	2e-25	119
TP35595	chr2H	98.44	64	1	0	1	64	63791440	63791503	1e-23	113
TP17238	chr2H	100	64	0	0	1	64	67723040	67723103	2e-25	119
TP99481	chr2H	98.44	64	1	0	1	64	68015696	68015633	1e-23	113
TP10839	chr2H	100	50	0	0	1	50	68313194	68313243	1e-17	93.5
TP63354	chr2H	96.88	64	2	0	1	64	68375519	68375456	5e-22	108
TP102044	chr2H	100	64	0	0	1	64	68493684	68493621	2e-25	119
TP11383	chr2H	98.44	64	1	0	1	64	69201728	69201665	1e-23	113
TP65024	chr2H	100	64	0	0	1	64	70641365	70641428	2e-25	119
TP6342	chr2H	98.44	64	1	0	1	64	71173378	71173315	1e-23	113
TP67735	chr2H	100	64	0	0	1	64	74091104	74091041	2e-25	119
TP74528	chr2H	98.44	64	1	0	1	64	74145181	74145118	1e-23	113
TP1809	chr2H	98.44	64	1	0	1	64	74594600	74594663	1e-23	113
TP13662	chr2H	98.44	64	1	0	1	64	75363289	75363226	1e-23	113
TP72833	chr2H	96.88	64	2	0	1	64	75552436	75552499	5e-22	108
TP23452	chr2H	100	64	0	0	1	64	77322687	77322750	2e-25	119
TP18600	chr2H	98.44	64	1	0	1	64	77490250	77490313	1e-23	113
TP38174	chr2H	93.75	64	4	0	1	64	78612961	78613024	1e-18	97.1
TP94911	chr2H	98.44	64	1	0	1	64	79054683	79054746	1e-23	113
TP63362	chr2H	100	33	0	0	32	64	79150478	79150446	4e-08	62.1
TP64629	chr2H	98.44	64	1	0	1	64	79311051	79311114	1e-23	113
TP86046	chr2H	98.44	64	1	0	1	64	79311054	79310991	1e-23	113
TP21174	chr2H	98.44	64	1	0	1	64	79376650	79376713	1e-23	113
TP48554	chr2H	100	64	0	0	1	64	82494369	82494306	2e-25	119
TP43596	chr2H	96.43	56	2	0	9	64	82644134	82644079	1e-17	93.5
TP57599	chr2H	100	64	0	0	1	64	84175445	84175382	2e-25	119
TP100597	chr2H	100	44	0	0	1	44	84311814	84311857	3e-14	82.4
TP19593	chr2H	98.44	64	1	0	1	64	88038440	88038503	1e-23	113
TP47413	chr2H	100	64	0	0	1	64	88813985	88814048	2e-25	119
TP37839	chr2H	100	45	0	0	1	45	89307411	89307455	8e-15	84.2
TP50052	chr2H	100	37	0	0	1	37	90242785	90242749	2e-10	69.4
TP67346	chr2H	100	64	0	0	1	64	90313693	90313630	2e-25	119
TP56976	chr2H	98.44	64	1	0	1	64	90322930	90322993	1e-23	113
TP59401	chr2H	100	64	0	0	1	64	92205517	92205580	2e-25	119
TP17593	chr2H	100	64	0	0	1	64	94049411	94049474	2e-25	119
TP88048	chr2H	100	64	0	0	1	64	94765878	94765941	2e-25	119
TP88384	chr2H	98.44	64	1	0	1	64	96411971	96412034	1e-23	113
TP45098	chr2H	98.44	64	1	0	1	64	97038951	97039014	1e-23	113
TP45785	chr2H	98.04	51	1	0	1	51	98845670	98845620	2e-16	89.8
TP93947	chr2H	100	64	0	0	1	64	99524213	99524150	2e-25	119
TP45181	chr2H	98.44	64	1	0	1	64	100839673	100839736	1e-23	113
TP36443	chr2H	100	63	0	0	1	63	102006204	102006266	8e-25	117
TP43210	chr2H	100	64	0	0	1	64	102392898	102392961	2e-25	119
TP21040	chr2H	98.44	64	1	0	1	64	102539597	102539534	1e-23	113
TP34183	chr2H	98.36	61	1	0	4	64	103816501	103816561	5e-22	108
TP11124	chr2H	100	63	0	0	1	63	105053177	105053239	8e-25	117
TP4654	chr2H	98.44	64	1	0	1	64	110055453	110055516	1e-23	113
TP94398	chr2H	100	64	0	0	1	64	110247260	110247323	2e-25	119
TP85754	chr2H	96.88	64	2	0	1	64	110290632	110290695	5e-22	108
TP12017	chr2H	98.44	64	1	0	1	64	110645558	110645621	1e-23	113
TP98579	chr2H	96.88	64	2	0	1	64	112027785	112027848	5e-22	108
TP43598	chr2H	100	64	0	0	1	64	112152782	112152719	2e-25	119
TP88296	chr2H	100	64	0	0	1	64	113876947	113877010	2e-25	119
TP73538	chr2H	98.44	64	1	0	1	64	114201414	114201477	1e-23	113
TP33948	chr2H	100	64	0	0	1	64	115080442	115080505	2e-25	119
TP72980	chr2H	100	64	0	0	1	64	115721952	115722015	2e-25	119
TP2818	chr2H	100	64	0	0	1	64	116296345	116296408	2e-25	119
TP24441	chr2H	100	64	0	0	1	64	116318352	116318289	2e-25	119
TP74558	chr2H	100	64	0	0	1	64	116791638	116791701	2e-25	119
TP58742	chr2H	97.62	42	1	0	1	42	117466023	117466064	2e-11	73.1
TP78976	chr2H	97.87	47	1	0	1	47	119494523	119494569	3e-14	82.4
TP12436	chr2H	100	64	0	0	1	64	122677224	122677287	2e-25	119
TP9755	chr2H	98.44	64	1	0	1	64	123592325	123592388	1e-23	113
TP54907	chr2H	100	47	0	0	1	47	123592328	123592282	6e-16	87.9
TP88512	chr2H	100	64	0	0	1	64	123997484	123997547	2e-25	119
TP5254	chr2H	98.44	64	1	0	1	64	123997487	123997424	1e-23	113
TP39434	chr2H	100	43	0	0	1	43	124071487	124071529	1e-13	80.5
TP12484	chr2H	100	64	0	0	1	64	125232507	125232444	2e-25	119
TP87214	chr2H	100	64	0	0	1	64	126601588	126601525	2e-25	119
TP7486	chr2H	100	64	0	0	1	64	127027250	127027187	2e-25	119
TP29293	chr2H	100	64	0	0	1	64	127030077	127030140	2e-25	119
TP71588	chr2H	100	61	0	0	1	61	127454021	127454081	1e-23	113
TP34443	chr2H	98.44	64	1	0	1	64	128259390	128259453	1e-23	113
TP68193	chr2H	100	62	0	0	1	62	128259393	128259332	3e-24	115	QEv.FW-2H.1
TP28745	chr2H	96.92	65	1	1	1	64	128268692	128268756	5e-22	108
TP28746	chr2H	100	64	0	0	1	64	128268692	128268755	2e-25	119
TP39466	chr2H	98.44	64	1	0	1	64	130671041	130670978	1e-23	113
TP35528	chr2H	97.67	43	0	1	2	44	131437569	131437528	2e-11	73.1
TP99056	chr2H	98.44	64	1	0	1	64	131836725	131836662	1e-23	113
TP69494	chr2H	98.44	64	1	0	1	64	132166278	132166341	1e-23	113
TP64152	chr2H	100	64	0	0	1	64	132250842	132250905	2e-25	119
TP86261	chr2H	98.44	64	1	0	1	64	132651712	132651775	1e-23	113
TP83199	chr2H	100	64	0	0	1	64	132828264	132828201	2e-25	119
TP91908	chr2H	98.44	64	1	0	1	64	132962007	132961944	1e-23	113
TP47768	chr2H	97.96	49	1	0	1	49	133424011	133424059	2e-15	86.1
TP95349	chr2H	100	64	0	0	1	64	134720863	134720926	2e-25	119
TP54162	chr2H	100	64	0	0	1	64	137144464	137144401	2e-25	119
TP25342	chr2H	100	61	0	0	1	61	138663507	138663447	1e-23	113
TP40044	chr2H	98.44	64	1	0	1	64	140553848	140553785	1e-23	113
TP40947	chr2H	100	57	0	0	1	57	141340765	141340821	2e-21	106
TP95986	chr2H	98.44	64	1	0	1	64	141674563	141674626	1e-23	113
TP46907	chr2H	98.44	64	1	0	1	64	142242037	142241974	1e-23	113
TP20481	chr2H	100	64	0	0	1	64	142606412	142606349	2e-25	119
TP37402	chr2H	98.44	64	1	0	1	64	144228267	144228330	1e-23	113
TP86502	chr2H	98.44	64	1	0	1	64	144228444	144228507	1e-23	113
TP19014	chr2H	98.44	64	1	0	1	64	144640076	144640139	1e-23	113
TP80132	chr2H	100	64	0	0	1	64	146356705	146356768	2e-25	119
TP49496	chr2H	100	64	0	0	1	64	147998703	147998640	2e-25	119
TP94447	chr2H	98.44	64	1	0	1	64	148380283	148380346	1e-23	113
TP46730	chr2H	100	43	0	0	1	43	150101534	150101492	1e-13	80.5
TP11753	chr2H	100	64	0	0	1	64	150911461	150911524	2e-25	119
TP6689	chr2H	98.44	64	1	0	1	64	152693261	152693324	1e-23	113
TP35175	chr2H	95.16	62	3	0	3	64	153118302	153118241	3e-19	99
TP71457	chr2H	100	51	0	0	1	51	156517745	156517795	4e-18	95.3
TP86362	chr2H	100	61	0	0	1	61	173194471	173194531	1e-23	113
TP35340	chr2H	100	48	0	0	1	48	178667117	178667164	2e-16	89.8
TP44507	chr2H	100	53	0	0	1	53	181969447	181969499	3e-19	99
TP15970	chr2H	100	64	0	0	1	64	181969450	181969387	2e-25	119
TP101181	chr2H	98.44	64	1	0	1	64	197572042	197572105	1e-23	113
TP42178	chr2H	100	40	0	0	1	40	204720181	204720142	5e-12	75
TP78803	chr2H	98.44	64	1	0	1	64	204970341	204970404	1e-23	113
TP57396	chr2H	98.41	63	1	0	1	63	204971802	204971740	4e-23	111
TP98474	chr2H	98.44	64	1	0	1	64	205854491	205854554	1e-23	113
TP15520	chr2H	100	59	0	0	1	59	209140273	209140331	1e-22	110
TP61114	chr2H	98.44	64	1	0	1	64	212181551	212181614	1e-23	113
TP34744	chr2H	98.44	64	1	0	1	64	214187916	214187979	1e-23	113
TP101825	chr2H	98.44	64	1	0	1	64	214755961	214755898	1e-23	113
TP58436	chr2H	100	61	0	0	1	61	219427838	219427898	1e-23	113
TP95903	chr2H	98.44	64	1	0	1	64	219427841	219427778	1e-23	113
TP32287	chr2H	100	60	0	0	1	60	222624178	222624237	4e-23	111
TP51562	chr2H	100	64	0	0	1	64	223277680	223277743	2e-25	119
TP32350	chr2H	98.44	64	1	0	1	64	223277683	223277620	1e-23	113
TP40939	chr2H	98.28	58	1	0	1	58	228512938	228512995	2e-20	102
TP40940	chr2H	98.28	58	1	0	1	58	228512938	228512995	2e-20	102
TP91246	chr2H	100	64	0	0	1	64	229947630	229947693	2e-25	119
TP82690	chr2H	98.44	64	1	0	1	64	231415136	231415073	1e-23	113
TP41738	chr2H	100	64	0	0	1	64	231842671	231842734	2e-25	119
TP28443	chr2H	97.73	44	1	0	1	44	234223140	234223097	1e-12	76.8
TP10847	chr2H	100	64	0	0	1	64	235354996	235355059	2e-25	119
TP72654	chr2H	98.25	57	1	0	1	57	236256568	236256512	8e-20	100
TP5613	chr2H	98.44	64	1	0	1	64	238165610	238165673	1e-23	113
TP9006	chr2H	98.44	64	1	0	1	64	238677206	238677143	1e-23	113
TP56211	chr2H	98.44	64	1	0	1	64	239094235	239094298	1e-23	113
TP40510	chr2H	97.92	48	1	0	1	48	239392890	239392843	8e-15	84.2
TP53127	chr2H	97.73	44	1	0	1	44	239735156	239735199	1e-12	76.8
TP21450	chr2H	98.44	64	1	0	1	64	240746558	240746495	1e-23	113
TP66522	chr2H	98.44	64	1	0	1	64	242626174	242626111	1e-23	113
TP51654	chr2H	95.16	62	3	0	1	62	252627433	252627494	3e-19	99
TP88091	chr2H	100	64	0	0	1	64	260928592	260928655	2e-25	119
TP66819	chr2H	100	64	0	0	1	64	277300367	277300430	2e-25	119
TP38260	chr2H	98.41	63	1	0	1	63	281053622	281053560	4e-23	111
TP76032	chr2H	100	64	0	0	1	64	283279558	283279621	2e-25	119
TP4837	chr2H	100	54	0	0	1	54	285248011	285247958	8e-20	100
TP39157	chr2H	98.44	64	1	0	1	64	289113545	289113608	1e-23	113
TP8495	chr2H	98.44	64	1	0	1	64	300708293	300708356	1e-23	113
TP58559	chr2H	100	52	0	0	1	52	303735219	303735270	1e-18	97.1
TP66326	chr2H	100	64	0	0	1	64	319089903	319089966	2e-25	119
TP36132	chr2H	98.15	54	1	0	1	54	322827124	322827071	4e-18	95.3
TP20582	chr2H	100	62	0	0	1	62	324060981	324060920	3e-24	115
TP79351	chr2H	100	64	0	0	1	64	325865514	325865451	2e-25	119
TP54699	chr2H	100	50	0	0	1	50	328127491	328127442	1e-17	93.5
TP92088	chr2H	100	61	0	0	1	61	328997805	328997865	1e-23	113
TP51833	chr2H	97.78	45	0	1	1	44	332411867	332411823	1e-12	76.8
TP54595	chr2H	100	64	0	0	1	64	334727745	334727682	2e-25	119
TP31817	chr2H	100	62	0	0	1	62	339220811	339220750	3e-24	115
TP49698	chr2H	100	62	0	0	1	62	339524943	339525004	3e-24	115
TP40524	chr2H	100	53	0	0	1	53	341773315	341773263	3e-19	99
TP40525	chr2H	100	53	0	0	1	53	341773315	341773263	3e-19	99
TP100463	chr2H	100	64	0	0	1	64	373659175	373659112	2e-25	119
TP52514	chr2H	96.72	61	2	0	1	61	375905247	375905307	2e-20	102
TP28395	chr2H	98.44	64	1	0	1	64	375998100	375998037	1e-23	113	QEv.CW-2H
TP16669	chr2H	100	64	0	0	1	64	382937550	382937487	2e-25	119
TP930	chr2H	98.44	64	1	0	1	64	385124308	385124245	1e-23	113
TP30339	chr2H	100	64	0	0	1	64	385593543	385593606	2e-25	119
TP30328	chr2H	100	40	0	0	1	40	398110031	398109992	5e-12	75
TP48059	chr2H	100	51	0	0	1	51	398539382	398539432	4e-18	95.3
TP76554	chr2H	100	64	0	0	1	64	405815453	405815516	2e-25	119
TP40929	chr2H	98.44	64	1	0	1	64	405865292	405865355	1e-23	113
TP35758	chr2H	96.08	51	2	0	1	51	407774942	407774892	8e-15	84.2
TP35759	chr2H	96.08	51	2	0	1	51	407774942	407774892	8e-15	84.2
TP53841	chr2H	98.33	60	1	0	1	60	408964602	408964543	2e-21	106
TP86393	chr2H	100	62	0	0	1	62	412260523	412260584	3e-24	115
TP47969	chr2H	98.39	62	1	0	3	64	413385453	413385514	1e-22	110
TP50256	chr2H	100	64	0	0	1	64	414912610	414912547	2e-25	119
TP25785	chr2H	100	52	0	0	1	52	419559562	419559511	1e-18	97.1
TP52766	chr2H	96.88	64	2	0	1	64	432400611	432400674	5e-22	108
TP1268	chr2H	98.44	64	1	0	1	64	433143662	433143725	1e-23	113
TP25344	chr2H	100	61	0	0	1	61	436816720	436816780	1e-23	113
TP27625	chr2H	95.35	43	1	1	1	43	437926030	437926071	8e-10	67.6
TP46067	chr2H	100	37	0	0	1	37	438834533	438834497	2e-10	69.4
TP43081	chr2H	98.39	62	1	0	1	62	447359045	447358984	1e-22	110
TP57292	chr2H	100	64	0	0	1	64	448368693	448368756	2e-25	119
TP6773	chr2H	100	64	0	0	1	64	449285999	449285936	2e-25	119
TP87506	chr2H	98.08	52	1	0	1	52	453711493	453711442	5e-17	91.6
TP50802	chr2H	98.18	55	1	0	1	55	456459792	456459738	1e-18	97.1
TP33039	chr2H	97.73	44	1	0	1	44	461171327	461171284	1e-12	76.8
TP62715	chr2H	98.08	52	1	0	1	52	462512494	462512443	5e-17	91.6
TP50674	chr2H	100	64	0	0	1	64	471564871	471564934	2e-25	119
TP46451	chr2H	98.44	64	1	0	1	64	473080795	473080858	1e-23	113
TP38499	chr2H	100	64	0	0	1	64	477238264	477238327	2e-25	119
TP36371	chr2H	98.44	64	1	0	1	64	478964261	478964198	1e-23	113
TP67611	chr2H	100	62	0	0	1	62	483116789	483116728	3e-24	115
TP5557	chr2H	98.44	64	0	1	1	64	485960672	485960734	4e-23	111
TP18281	chr2H	100	64	0	0	1	64	486877703	486877766	2e-25	119
TP21959	chr2H	98.44	64	1	0	1	64	486877706	486877643	1e-23	113
TP50736	chr2H	100	64	0	0	1	64	491106211	491106274	2e-25	119
TP59004	chr2H	97.62	42	1	0	1	42	491267979	491267938	2e-11	73.1
TP57566	chr2H	100	64	0	0	1	64	492752512	492752449	2e-25	119
TP101102	chr2H	100	64	0	0	1	64	492904807	492904870	2e-25	119
TP13961	chr2H	100	64	0	0	1	64	498105144	498105081	2e-25	119
TP93932	chr2H	100	64	0	0	1	64	500587022	500587085	2e-25	119
TP55913	chr2H	100	64	0	0	1	64	501281080	501281017	2e-25	119
TP91977	chr2H	100	60	0	0	1	60	501905948	501905889	4e-23	111
TP28652	chr2H	98.44	64	1	0	1	64	503662035	503661972	1e-23	113
TP13660	chr2H	100	64	0	0	1	64	507113923	507113860	2e-25	119
TP31522	chr2H	98.44	64	1	0	1	64	510203235	510203172	1e-23	113
TP70457	chr2H	100	64	0	0	1	64	511381770	511381833	2e-25	119
TP98103	chr2H	100	64	0	0	1	64	511580576	511580513	2e-25	119
TP23772	chr2H	100	62	0	0	1	62	512544932	512544993	3e-24	115
TP10669	chr2H	100	40	0	0	1	40	512922838	512922877	5e-12	75
TP23249	chr2H	98.44	64	1	0	1	64	513419035	513418972	1e-23	113	QYld.CW-2H.1
TP45335	chr2H	98.44	64	1	0	1	64	515910592	515910655	1e-23	113	QLrol.FW-2H
TP108	chr2H	98.44	64	1	0	1	64	520251734	520251797	1e-23	113
TP34689	chr2H	97.83	46	1	0	1	46	520411335	520411380	1e-13	80.5
HvCEN (JX648176.1)	chr2H	99.71	2081	5	1	1	2080	523377195	523379275	0	3808
TP54574	chr2H	100	64	0	0	1	64	524813226	524813163	2e-25	119
TP34345	chr2H	100	64	0	0	1	64	528994533	528994470	2e-25	119
TP60114	chr2H	98.44	64	1	0	1	64	529066915	529066852	1e-23	113	QYld.FW-2H.1
TP38487	chr2H	96.88	64	2	0	1	64	530641477	530641540	5e-22	108
TP36861	chr2H	94.83	58	3	0	4	61	534503891	534503834	5e-17	91.6
TP15830	chr2H	100	64	0	0	1	64	536410070	536410133	2e-25	119
TP21116	chr2H	98.44	64	1	0	1	64	539302199	539302262	1e-23	113
TP61639	chr2H	100	48	0	0	1	48	541882652	541882605	2e-16	89.8
TP65459	chr2H	98.44	64	1	0	1	64	542045717	542045654	1e-23	113
TP42074	chr2H	96.88	64	2	0	1	64	542380145	542380208	5e-22	108
TP58367	chr2H	98.44	64	1	0	1	64	543596090	543596027	1e-23	113
TP60285	chr2H	100	46	0	0	1	46	543959400	543959445	2e-15	86.1
TP69033	chr2H	100	64	0	0	1	64	543959403	543959340	2e-25	119
TP59600	chr2H	100	64	0	0	1	64	544040084	544040021	2e-25	119
TP98086	chr2H	100	64	0	0	1	64	544050011	544050074	2e-25	119
TP76356	chr2H	98.44	64	1	0	1	64	544911429	544911366	1e-23	113
TP61081	chr2H	98.44	64	1	0	1	64	545105988	545106051	1e-23	113
TP14540	chr2H	100	64	0	0	1	64	549652602	549652539	2e-25	119
TP90220	chr2H	100	64	0	0	1	64	552067180	552067117	2e-25	119
TP99332	chr2H	98.44	64	1	0	1	64	553863554	553863491	1e-23	113
TP7394	chr2H	98.44	64	1	0	1	64	555434699	555434636	1e-23	113
TP49961	chr2H	98.31	59	0	1	1	58	556520861	556520803	2e-20	102
TP91514	chr2H	98.44	64	1	0	1	64	556672386	556672449	1e-23	113
TP34097	chr2H	100	64	0	0	1	64	564309176	564309113	2e-25	119
TP12672	chr2H	100	64	0	0	1	64	564455222	564455285	2e-25	119
TP87168	chr2H	98.44	64	1	0	1	64	566895792	566895729	1e-23	113
TP15338	chr2H	98.31	59	1	0	1	59	568417726	568417784	6e-21	104
TP89823	chr2H	100	64	0	0	1	64	569392658	569392721	2e-25	119
TP10389	chr2H	98.44	64	1	0	1	64	576959100	576959037	1e-23	113
TP33135	chr2H	98.44	64	1	0	1	64	579639899	579639836	1e-23	113
TP78356	chr2H	100	56	0	0	1	56	585450103	585450048	6e-21	104
TP55386	chr2H	98.44	64	1	0	1	64	588654220	588654157	1e-23	113
TP93804	chr2H	98.44	64	1	0	1	64	591311475	591311538	1e-23	113
TP11534	chr2H	100	60	0	0	1	60	591729197	591729256	4e-23	111
TP11023	chr2H	100	64	0	0	1	64	592039425	592039488	2e-25	119
TP9266	chr2H	98.44	64	1	0	1	64	592062363	592062426	1e-23	113
TP81173	chr2H	100	64	0	0	1	64	603734063	603734000	2e-25	119
TP60661	chr2H	100	45	0	0	1	45	604446472	604446516	8e-15	84.2
TP99366	chr2H	97.56	41	1	0	24	64	605250664	605250624	6e-11	71.3
TP29491	chr2H	100	47	0	0	1	47	605782134	605782088	6e-16	87.9	QLwax.CW-2H
TP63716	chr2H	98.44	64	1	0	1	64	606231702	606231765	1e-23	113
TP87960	chr2H	100	64	0	0	1	64	610879088	610879151	2e-25	119
TP22935	chr2H	100	64	0	0	1	64	610945166	610945229	2e-25	119
TP4963	chr2H	98.44	64	1	0	1	64	612012900	612012837	1e-23	113	QLwax.FW-2H
TP34123-TP7819	chr2H	98.44	64	1	0	1	64	612519140	612519203	1e-23	113	QYld.FW-2H.2
TP7601	chr2H	100	64	0	0	1	64	612549334	612549397	2e-25	119
TP47839	chr2H	100	62	0	0	1	62	612549337	612549276	3e-24	115
TP43078	chr2H	96.88	64	2	0	1	64	616730356	616730419	5e-22	108
TP46478	chr2H	98.08	52	1	0	1	52	616911838	616911889	5e-17	91.6
TP15266	chr2H	100	64	0	0	1	64	617831489	617831426	2e-25	119
TP68348	chr2H	100	64	0	0	1	64	619135600	619135663	2e-25	119
TP73048	chr2H	98.33	60	1	0	1	60	620279770	620279829	2e-21	106
TP81471	chr2H	100	64	0	0	1	64	620621482	620621545	2e-25	119
TP96023	chr2H	98.44	64	1	0	1	64	621088163	621088100	1e-23	113
TP98488	chr2H	100	64	0	0	1	64	621784356	621784419	2e-25	119
TP45420	chr2H	98.44	64	1	0	1	64	622535137	622535074	1e-23	113
TP35226	chr2H	100	64	0	0	1	64	622778057	622777994	2e-25	119
TP9997	chr2H	98.44	64	1	0	1	64	631829364	631829427	1e-23	113
TP13607	chr2H	100	64	0	0	1	64	631901500	631901437	2e-25	119
TP92415	chr2H	96.88	64	2	0	1	64	632227938	632228001	5e-22	108
TP47834	chr2H	98.44	64	1	0	1	64	632288333	632288396	1e-23	113
TP38094	chr2H	100	62	0	0	1	62	632608438	632608377	3e-24	115
TP32648	chr2H	100	64	0	0	1	64	632650128	632650065	2e-25	119
TP3540	chr2H	98.44	64	1	0	1	64	632693029	632692966	1e-23	113
TP95796	chr2H	100	64	0	0	1	64	632848476	632848539	2e-25	119
TP52313	chr2H	98.44	64	1	0	1	64	632848479	632848416	1e-23	113
TP52785	chr2H	100	62	0	0	1	62	635071989	635071928	3e-24	115
TP6747	chr2H	100	49	0	0	1	49	636972544	636972496	5e-17	91.6
TP87352	chr2H	98.44	64	1	0	1	64	637962511	637962448	1e-23	113
TP12831	chr2H	98.44	64	1	0	1	64	638375304	638375367	1e-23	113
TP40262	chr2H	98.44	64	1	0	1	64	638432759	638432822	1e-23	113
TP46364	chr2H	100	64	0	0	1	64	638903079	638903016	2e-25	119
TP91212	chr2H	98.44	64	1	0	1	64	638951717	638951780	1e-23	113
TP75766	chr2H	98.44	64	1	0	1	64	639061736	639061799	1e-23	113
TP21091	chr2H	98.44	64	1	0	1	64	639061739	639061676	1e-23	113
TP11990	chr2H	98.44	64	1	0	1	64	639229396	639229459	1e-23	113
TP23594	chr2H	98.44	64	1	0	1	64	639289617	639289554	1e-23	113
TP22020	chr2H	98.44	64	1	0	1	64	640234174	640234237	1e-23	113
TP19743	chr2H	96.61	59	1	1	1	59	640771191	640771134	1e-18	97.1
TP93552	chr2H	100	64	0	0	1	64	642736128	642736191	2e-25	119
TP7819	chr2H	98.44	64	1	0	1	64	643534443	643534380	1e-23	113
TP63509	chr2H	100	64	0	0	1	64	644152417	644152354	2e-25	119
TP76296	chr2H	98.44	64	1	0	1	64	644674369	644674432	1e-23	113
TP66181	chr2H	98.44	64	1	0	1	64	645208310	645208247	1e-23	113
TP6042	chr2H	96.49	57	1	1	1	57	645396504	645396449	1e-17	93.5
TP70923	chr2H	97.78	45	1	0	1	45	645593971	645594015	4e-13	78.7
TP67507	chr2H	98.44	64	1	0	1	64	645957959	645957896	1e-23	113
TP55204	chr2H	98.04	51	0	1	1	51	647137089	647137138	6e-16	87.9
TP13803	chr2H	100	64	0	0	1	64	647280792	647280729	2e-25	119
TP47040	chr2H	100	64	0	0	1	64	647829189	647829126	2e-25	119
TP42197	chr2H	98.44	64	1	0	1	64	648021884	648021947	1e-23	113
TP80357	chr2H	100	45	0	0	1	45	648365676	648365720	8e-15	84.2
TP100006	chr2H	98.44	64	1	0	1	64	649204225	649204162	1e-23	113
TP32468	chr2H	98.44	64	1	0	1	64	649520020	649519957	1e-23	113
TP4957	chr2H	98.11	53	0	1	1	53	649818898	649818847	5e-17	91.6
TP40745	chr2H	100	64	0	0	1	64	649970595	649970658	2e-25	119
TP55129	chr2H	100	64	0	0	1	64	649977564	649977627	2e-25	119
TP59937	chr2H	98.44	64	1	0	1	64	650113646	650113709	1e-23	113
TP56662	chr2H	98.44	64	1	0	1	64	650227823	650227886	1e-23	113
TP34973	chr2H	97.37	38	1	0	1	38	654964953	654964916	3e-09	65.8
TP88507	chr2H	100	64	0	0	1	64	655349284	655349221	2e-25	119
TP42640	chr2H	97.37	38	1	0	1	38	655481289	655481252	3e-09	65.8
TP21034	chr2H	98.33	60	1	0	1	60	657047932	657047873	2e-21	106
TP71454	chr2H	96.15	52	2	0	1	52	664078155	664078206	2e-15	86.1
TP72950	chr2H	100	61	0	0	1	61	667557481	667557541	1e-23	113
TP102593	chr2H	100	57	0	0	1	57	669477058	669477002	2e-21	106
TP10554	chr2H	98.44	64	1	0	1	64	669739180	669739243	1e-23	113	QYld.CF-2H
TP40104	chr2H	100	41	0	0	1	41	670212617	670212657	1e-12	76.8	QEv.FW-2H.2
TP36157	chr2H	98.11	53	1	0	1	53	672235106	672235054	1e-17	93.5
TP53680	chr2H	100	64	0	0	1	64	673637751	673637814	2e-25	119
TP82103	chr2H	100	64	0	0	1	64	673647914	673647851	2e-25	119
TP5341	chr2H	100	64	0	0	1	64	673853026	673852963	2e-25	119
TP81854	chr2H	100	42	0	0	1	42	673991540	673991581	4e-13	78.7
TP23732	chr2H	98.15	54	1	0	1	54	673992809	673992756	4e-18	95.3
TP64905	chr2H	100	64	0	0	1	64	676347666	676347603	2e-25	119
TP11459	chr2H	100	48	0	0	1	48	676852149	676852102	2e-16	89.8
TP51520	chr2H	100	39	0	0	4	42	678287751	678287713	2e-11	73.1
TP51521	chr2H	100	39	0	0	4	42	678287751	678287713	2e-11	73.1
TP91649	chr2H	100	64	0	0	1	64	682299577	682299640	2e-25	119
TP10011	chr2H	100	64	0	0	1	64	682420819	682420882	2e-25	119
TP38877	chr2H	100	61	0	0	1	61	682423077	682423137	1e-23	113
TP93969	chr2H	100	58	0	0	1	58	682572315	682572372	5e-22	108
TP44400	chr2H	98.18	55	1	0	1	55	682773132	682773186	1e-18	97.1
TP65155	chr2H	100	64	0	0	1	64	683597627	683597690	2e-25	119
TP79050	chr2H	98.44	64	1	0	1	64	683736507	683736444	1e-23	113
TP75438	chr2H	100	48	0	0	1	48	683736966	683737013	2e-16	89.8
TP75051	chr2H	98.44	64	1	0	1	64	684080597	684080660	1e-23	113
TP47125	chr2H	98.44	64	1	0	1	64	684122262	684122325	1e-23	113
TP95520	chr2H	98.44	64	1	0	1	64	684499038	684499101	1e-23	113
TP15908	chr2H	98.44	64	1	0	1	64	684546131	684546194	1e-23	113
TP22409	chr2H	98.44	64	1	0	1	64	685218871	685218934	1e-23	113
TP12699	chr2H	100	64	0	0	1	64	685381144	685381207	2e-25	119
TP55950	chr2H	100	64	0	0	1	64	685486554	685486617	2e-25	119
TP11506	chr2H	100	64	0	0	1	64	685490068	685490005	2e-25	119
TP3851	chr2H	100	61	0	0	1	61	685782790	685782730	1e-23	113
TP15293	chr2H	100	64	0	0	1	64	686120428	686120365	2e-25	119
TP16692	chr2H	100	64	0	0	1	64	687145281	687145344	2e-25	119
TP90464	chr2H	98.44	64	1	0	1	64	687145767	687145704	1e-23	113
TP83630	chr2H	100	64	0	0	1	64	687238160	687238223	2e-25	119
TP9905	chr2H	98.44	64	1	0	1	64	687583218	687583155	1e-23	113
TP5679	chr2H	98.44	64	1	0	1	64	687867611	687867548	1e-23	113
TP9969	chr2H	100	54	0	0	1	54	687892999	687893052	8e-20	100	QMat.CF-2H.1
TP67915	chr2H	98.31	59	1	0	1	59	688554008	688554066	6e-21	104
TP1533	chr2H	98.44	64	1	0	1	64	688573823	688573886	1e-23	113
TP64991	chr2H	98.44	64	1	0	1	64	688784752	688784689	1e-23	113
TP13710	chr2H	98.44	64	1	0	1	64	689642194	689642131	1e-23	113	QLrol.CF-2H
TP64915	chr2H	98.15	54	1	0	1	54	689917186	689917239	4e-18	95.3
TP35312	chr2H	100	62	0	0	1	62	689917189	689917128	3e-24	115
TP64066	chr2H	100	64	0	0	1	64	690026134	690026071	2e-25	119
TP75828	chr2H	100	64	0	0	1	64	691871885	691871948	2e-25	119
TP86402	chr2H	100	64	0	0	1	64	691945250	691945187	2e-25	119
TP36047	chr2H	100	42	0	0	1	42	691985371	691985330	4e-13	78.7
TP84880	chr2H	100	64	0	0	1	64	692064417	692064354	2e-25	119
TP89765	chr2H	98.44	64	1	0	1	64	692493604	692493541	1e-23	113
TP53503	chr2H	95.65	46	1	1	1	46	692711135	692711091	2e-11	73.1
TP89273	chr2H	98.44	64	1	0	1	64	693200842	693200905	1e-23	113
TP12226	chr2H	98.44	64	1	0	1	64	693643399	693643336	1e-23	113
TP49391	chr2H	100	64	0	0	1	64	693803286	693803349	2e-25	119
TP97701-TP46704	chr2H	98.44	64	1	0	1	64	693840275	693840212	1e-23	113	QPlum.FW-2H
TP94388	chr2H	100	64	0	0	1	64	693890193	693890256	2e-25	119
TP1926	chr2H	100	64	0	0	1	64	694118133	694118196	2e-25	119
TP59347	chr2H	96.88	64	2	0	1	64	694690048	694689985	5e-22	108
TP11338	chr2H	100	62	0	0	3	64	694882097	694882036	3e-24	115
TP55083	chr2H	100	64	0	0	1	64	694929941	694929878	2e-25	119
TP60704	chr2H	96.88	64	2	0	1	64	695054437	695054374	5e-22	108
TP22227	chr2H	100	64	0	0	1	64	695057790	695057853	2e-25	119
TP95832	chr2H	96.88	64	2	0	1	64	695087092	695087155	5e-22	108
TP61056	chr2H	98.44	64	1	0	1	64	695588870	695588933	1e-23	113
TP43781	chr2H	98.44	64	1	0	1	64	695756426	695756363	1e-23	113
TP27459	chr2H	98.44	64	1	0	1	64	695778735	695778798	1e-23	113
TP12513	chr2H	98.44	64	1	0	1	64	695898030	695898093	1e-23	113
TP96297	chr2H	98.44	64	1	0	1	64	695906312	695906249	1e-23	113
TP1641	chr2H	98.44	64	1	0	1	64	695914021	695914084	1e-23	113
TP39959	chr2H	96.15	52	1	1	1	51	696255926	696255977	8e-15	84.2
TP55417	chr2H	100	64	0	0	1	64	696277039	696277102	2e-25	119
TP30168	chr2H	98.44	64	1	0	1	64	696297059	696296996	1e-23	113
TP21571	chr2H	100	64	0	0	1	64	696298791	696298854	2e-25	119
TP23260	chr2H	97.83	46	1	0	1	46	696375290	696375335	1e-13	80.5
TP47234	chr2H	100	64	0	0	1	64	696375480	696375417	2e-25	119
TP95633	chr2H	98.44	64	1	0	1	64	697283083	697283020	1e-23	113
TP46680	chr2H	98.44	64	1	0	1	64	698875589	698875526	1e-23	113
TP101574	chr2H	100	57	0	0	1	57	699312591	699312535	2e-21	106
TP23323	chr2H	100	55	0	0	1	55	699325157	699325103	2e-20	102
TP715	chr2H	100	64	0	0	1	64	700077676	700077613	2e-25	119
TP32075	chr2H	96.97	66	0	1	1	64	700138796	700138731	1e-22	110
TP28315	chr2H	98.44	64	1	0	1	64	700497719	700497656	1e-23	113
TP82917	chr2H	100	64	0	0	1	64	700568186	700568123	2e-25	119
TP15856	chr2H	100	64	0	0	1	64	700788969	700789032	2e-25	119
TP46704	chr2H	100	64	0	0	1	64	701486346	701486409	2e-25	119
TP27302	chr2H	100	51	0	0	1	51	701643997	701643947	4e-18	95.3
TP53937	chr2H	98.44	64	1	0	1	64	702100506	702100569	1e-23	113
TP6704	chr2H	96.88	64	2	0	1	64	702225216	702225279	5e-22	108	QPlum.CW-2H.2
TP13640	chr2H	100	64	0	0	1	64	702268750	702268813	2e-25	119
TP20702	chr2H	98.44	64	1	0	1	64	702308876	702308939	1e-23	113
TP57368	chr2H	100	49	0	0	1	49	703154787	703154835	5e-17	91.6
TP76441	chr2H	100	64	0	0	1	64	703931888	703931951	2e-25	119
TP94365	chr2H	100	64	0	0	1	64	703934448	703934385	2e-25	119
TP49171	chr2H	98.44	64	1	0	1	64	703974926	703974989	1e-23	113
TP92057	chr2H	100	64	0	0	1	64	704316412	704316475	2e-25	119
TP64477	chr2H	97.87	47	1	0	1	47	704317279	704317325	3e-14	82.4
TP93811	chr2H	100	64	0	0	1	64	704318832	704318769	2e-25	119
TP59052	chr2H	100	39	0	0	1	39	704367298	704367336	2e-11	73.1
TP43335	chr2H	98.44	64	1	0	1	64	704368668	704368731	1e-23	113	QYld.CW-2H.2
TP80936	chr2H	100	64	0	0	1	64	704827524	704827461	2e-25	119
TP93607	chr2H	98.44	64	1	0	1	64	704876257	704876320	1e-23	113
TP41522	chr2H	100	64	0	0	1	64	704879465	704879402	2e-25	119
TP61288	chr2H	100	61	0	0	1	61	704879799	704879739	1e-23	113
TP41387	chr2H	93.75	64	1	2	1	64	705244583	705244643	1e-17	93.5
TP95148	chr2H	96.88	64	2	0	1	64	705331325	705331262	5e-22	108
TP59025	chr2H	100	49	0	0	1	49	705855615	705855567	5e-17	91.6
TP15254	chr2H	100	64	0	0	1	64	706335325	706335388	2e-25	119
TP76556	chr2H	100	64	0	0	1	64	706345048	706344985	2e-25	119
TP30614	chr2H	98.44	64	1	0	1	64	706444958	706445021	1e-23	113
TP77763	chr2H	100	64	0	0	1	64	706464713	706464650	2e-25	119
TP101351	chr2H	98.44	64	1	0	1	64	706475680	706475743	1e-23	113
TP62431	chr2H	100	43	0	0	1	43	706871836	706871878	1e-13	80.5
TP50700	chr2H	98.44	64	1	0	1	64	707599175	707599238	1e-23	113
TP23062	chr2H	98.44	64	1	0	1	64	707699727	707699664	1e-23	113
TP4306	chr2H	100	64	0	0	1	64	708230142	708230205	2e-25	119
TP44534	chr2H	96.88	64	2	0	1	64	708489817	708489880	5e-22	108
TP8856	chr2H	98.28	58	1	0	1	58	708537171	708537228	2e-20	102
TP40543	chr2H	100	52	0	0	1	52	708537174	708537123	1e-18	97.1
TP75475	chr2H	100	64	0	0	1	64	708573984	708574047	2e-25	119
TP3892	chr2H	100	64	0	0	1	64	708810467	708810530	2e-25	119
TP39502	chr2H	98.44	64	1	0	1	64	708864135	708864198	1e-23	113
TP94590	chr2H	100	64	0	0	1	64	709187319	709187382	2e-25	119
TP17886	chr2H	98.44	64	1	0	1	64	709328711	709328774	1e-23	113
TP50174	chr2H	98.44	64	1	0	1	64	709855654	709855717	1e-23	113
TP89647	chr2H	98.11	53	1	0	1	53	710000337	710000285	1e-17	93.5
TP60362	chr2H	100	64	0	0	1	64	710338112	710338049	2e-25	119
TP81628	chr2H	100	64	0	0	1	64	710658299	710658236	2e-25	119
TP75709	chr2H	100	64	0	0	1	64	710842928	710842865	2e-25	119
TP78816	chr2H	100	64	0	0	1	64	710857400	710857337	2e-25	119
TP11978	chr2H	98.44	64	1	0	1	64	710995578	710995515	1e-23	113
TP100544	chr2H	100	64	0	0	1	64	711160467	711160530	2e-25	119
TP31287	chr2H	98.44	64	1	0	1	64	713239998	713239935	1e-23	113
TP22483	chr2H	100	48	0	0	1	48	713270554	713270507	2e-16	89.8
TP101152	chr2H	98.44	64	1	0	1	64	713889656	713889719	1e-23	113
TP32922	chr2H	98.44	64	1	0	1	64	713921657	713921594	1e-23	113
TP85843	chr2H	94.64	56	3	0	1	56	714355380	714355435	6e-16	87.9
TP55475	chr2H	98.44	64	1	0	1	64	714915575	714915638	1e-23	113
TP19546	chr2H	100	64	0	0	1	64	714984392	714984329	2e-25	119
TP57715	chr2H	100	64	0	0	1	64	715385489	715385426	2e-25	119
TP92854	chr2H	98.04	51	1	0	1	51	715459483	715459533	2e-16	89.8
TP79053	chr2H	100	64	0	0	1	64	715705314	715705251	2e-25	119
TP43561	chr2H	100	64	0	0	1	64	715705455	715705518	2e-25	119
TP36520	chr2H	100	64	0	0	1	64	715837840	715837777	2e-25	119
TP47230	chr2H	98.44	64	1	0	1	64	716136578	716136515	1e-23	113
TP93064	chr2H	98.44	64	1	0	1	64	716227415	716227478	1e-23	113
TP80760	chr2H	100	64	0	0	1	64	716398028	716398091	2e-25	119
TP46626	chr2H	98.36	61	1	0	1	61	716448734	716448794	5e-22	108
TP44274	chr2H	100	62	0	0	1	62	716449864	716449803	3e-24	115
TP20084	chr2H	98.21	56	1	0	1	56	716543074	716543129	3e-19	99
TP22507	chr2H	98.44	64	1	0	1	64	716611324	716611387	1e-23	113
TP59715	chr2H	96.88	64	2	0	1	64	717277231	717277294	5e-22	108
TP101490	chr2H	100	64	0	0	1	64	717315332	717315269	2e-25	119
TP115	chr2H	100	64	0	0	1	64	717336694	717336631	2e-25	119
TP18240	chr2H	100	64	0	0	1	64	718157818	718157755	2e-25	119
TP21538	chr2H	100	64	0	0	1	64	718326070	718326133	2e-25	119
TP84676	chr2H	100	62	0	0	1	62	718482370	718482431	3e-24	115
TP86022	chr2H	100	64	0	0	1	64	718791041	718790978	2e-25	119
TP19710	chr2H	98.44	64	1	0	1	64	718792384	718792321	1e-23	113
TP17996	chr2H	98.44	64	1	0	1	64	718962797	718962734	1e-23	113
TP26994	chr2H	100	39	0	0	1	39	719063488	719063526	2e-11	73.1
TP21143	chr2H	98.44	64	1	0	1	64	719151689	719151626	1e-23	113
TP78288-TP88727	chr2H	98.44	64	1	0	1	64	719314439	719314376	1e-23	113	QYld.FW-2H.3
TP53917	chr2H	98.44	64	1	0	1	64	719420345	719420408	1e-23	113
TP8584	chr2H	97.92	48	1	0	1	48	720033171	720033124	8e-15	84.2
TP36885	chr2H	100	64	0	0	1	64	720088885	720088822	2e-25	119
TP88727	chr2H	100	64	0	0	1	64	720092106	720092043	2e-25	119
TP6364-TP89065	chr2H	98.44	64	1	0	1	64	720497685	720497748	1e-23	113	QMat.FW-2H
TP55481	chr2H	98.44	64	1	0	1	64	720509758	720509821	1e-23	113
TP76226	chr2H	100	64	0	0	1	64	721190156	721190219	2e-25	119
TP27545	chr2H	100	64	0	0	1	64	721654229	721654292	2e-25	119
TP58251	chr2H	98.44	64	1	0	1	64	723246276	723246213	1e-23	113
TP89065	chr2H	96.88	64	2	0	1	64	723509055	723508992	5e-22	108
TP40876	chr2H	100	64	0	0	1	64	724576571	724576634	2e-25	119
TP30827	chr2H	100	64	0	0	1	64	724652922	724652859	2e-25	119
TP65086	chr2H	100	64	0	0	1	64	724793618	724793681	2e-25	119
TP95194	chr2H	100	64	0	0	1	64	724866595	724866532	2e-25	119
TP45980	chr2H	96.88	64	0	1	1	64	724938902	724938963	2e-21	106
TP45968	chr2H	98.44	64	1	0	1	64	724938905	724938842	1e-23	113
TP55575	chr2H	98.44	64	1	0	1	64	724965591	724965654	1e-23	113
TP25159	chr2H	97.96	49	1	0	1	49	725229586	725229634	2e-15	86.1
TP66624	chr2H	98.44	64	1	0	1	64	725825503	725825566	1e-23	113
TP27355	chr2H	98.44	64	1	0	1	64	725825506	725825443	1e-23	113
TP57639	chr2H	100	64	0	0	1	64	726014245	726014182	2e-25	119
TP68966	chr2H	98.18	55	1	0	1	55	726976321	726976375	1e-18	97.1
TP26637	chr2H	98.44	64	1	0	1	64	726979501	726979438	1e-23	113
TP89291	chr2H	98.44	64	1	0	1	64	727209028	727209091	1e-23	113
TP11310	chr2H	100	64	0	0	1	64	727210450	727210513	2e-25	119
TP57281	chr2H	100	40	0	0	1	40	727266452	727266491	5e-12	75
TP56964	chr2H	98.44	64	1	0	1	64	727323992	727323929	1e-23	113
TP63923	chr2H	100	64	0	0	1	64	727408922	727408985	2e-25	119
TP66195	chr2H	98.44	64	1	0	1	64	727483872	727483809	1e-23	113
TP36557	chr2H	100	64	0	0	1	64	727492225	727492162	2e-25	119
TP20578	chr2H	98.44	64	1	0	1	64	727551250	727551313	1e-23	113
TP80713	chr2H	100	64	0	0	1	64	727648566	727648503	2e-25	119
TP4577	chr2H	100	64	0	0	1	64	727797081	727797018	2e-25	119
TP25505	chr2H	98.44	64	1	0	1	64	727927717	727927780	1e-23	113
TP1453	chr2H	98.44	64	1	0	1	64	727985335	727985398	1e-23	113
TP20318	chr2H	98.36	61	1	0	1	61	728052595	728052655	5e-22	108
TP75824	chr2H	98.44	64	1	0	1	64	728221420	728221483	1e-23	113
TP57543	chr2H	100	64	0	0	1	64	728302601	728302664	2e-25	119
TP8829	chr2H	98.44	64	1	0	1	64	728788365	728788428	1e-23	113
TP90413	chr2H	100	64	0	0	1	64	728788368	728788305	2e-25	119
TP26	chr2H	100	64	0	0	1	64	729334798	729334861	2e-25	119
TP37338	chr2H	97.56	41	1	0	1	41	729416320	729416360	6e-11	71.3
TP63248	chr2H	98.44	64	1	0	1	64	729750498	729750435	1e-23	113
TP91522	chr2H	95.31	64	3	0	1	64	729830458	729830395	2e-20	102
TP8949	chr2H	98.44	64	1	0	1	64	729861971	729862034	1e-23	113
TP13971	chr2H	100	64	0	0	1	64	729963136	729963073	2e-25	119
HvAP2_672	chr2H	99	200	2	0	1	200	730028755	730028954	2e-97	361
TP27937	chr2H	100	64	0	0	1	64	730047621	730047684	2e-25	119
TP13025	chr2H	100	50	0	0	1	50	730538503	730538552	1e-17	93.5
TP93839	chr2H	98.44	64	1	0	1	64	730572164	730572101	1e-23	113
TP49203	chr2H	100	46	0	0	1	46	730643418	730643463	2e-15	86.1
TP82341	chr2H	100	64	0	0	1	64	730912707	730912644	2e-25	119
TP40387	chr2H	98.44	64	1	0	1	64	730968723	730968786	1e-23	113
TP85045	chr2H	98.44	64	1	0	1	64	731229098	731229035	1e-23	113
TP59866	chr2H	100	56	0	0	1	56	731273171	731273226	6e-21	104
TP89301	chr2H	100	62	0	0	1	62	731273174	731273113	3e-24	115
TP38703	chr2H	96.67	60	1	1	1	60	732294001	732293943	3e-19	99
TP71048	chr2H	100	61	0	0	1	61	732422689	732422629	1e-23	113
TP6478	chr2H	98.33	60	1	0	1	60	732544623	732544564	2e-21	106
TP52375	chr2H	98.44	64	1	0	1	64	732556732	732556669	1e-23	113	QMat.CF-2H.2
TP63223	chr2H	98.44	64	1	0	1	64	732802479	732802542	1e-23	113
TP102440	chr2H	100	64	0	0	1	64	732844852	732844789	2e-25	119
TP101955	chr2H	100	62	0	0	1	62	732889049	732888988	3e-24	115
TP60055	chr2H	100	64	0	0	1	64	733446355	733446292	2e-25	119
TP97988	chr2H	100	56	0	0	1	56	733526180	733526125	6e-21	104
TP67357	chr2H	98.21	56	0	1	1	56	733526614	733526560	1e-18	97.1
TP84143	chr2H	100	64	0	0	1	64	733690500	733690563	2e-25	119
TP75583	chr2H	98.44	64	1	0	1	64	734181829	734181766	1e-23	113
TP92037	chr2H	100	62	0	0	1	62	734215590	734215529	3e-24	115
TP70655	chr2H	97.83	46	1	0	1	46	734219509	734219464	1e-13	80.5
TP92277	chr2H	100	64	0	0	1	64	734219672	734219609	2e-25	119
TP85187	chr2H	100	64	0	0	1	64	734236659	734236596	2e-25	119
TP77427	chr2H	100	64	0	0	1	64	735140456	735140519	2e-25	119
TP83249	chr2H	97.73	44	1	0	1	44	735140459	735140416	1e-12	76.8
TP1452	chr2H	100	64	0	0	1	64	736041564	736041501	2e-25	119
TP1561	chr2H	100	56	0	0	1	56	736296997	736297052	6e-21	104
TP68505	chr2H	98.44	64	1	0	1	64	736369919	736369982	1e-23	113
TP71806	chr2H	100	64	0	0	1	64	737025867	737025930	2e-25	119
TP62950	chr2H	100	50	0	0	1	50	737171708	737171757	1e-17	93.5
TP11326	chr2H	96.88	64	2	0	1	64	737661540	737661603	5e-22	108
TP63115	chr2H	98.44	64	1	0	1	64	738562492	738562555	1e-23	113
TP102571	chr2H	96.88	64	2	0	1	64	738794792	738794729	5e-22	108
TP37933	chr2H	100	30	0	0	1	30	739024922	739024951	2e-06	56.5
TP66028	chr2H	100	64	0	0	1	64	739364772	739364709	2e-25	119
TP90354	chr2H	100	50	0	0	1	50	739365018	739365067	1e-17	93.5
TP59190	chr2H	96.61	59	0	2	1	58	739427211	739427268	1e-18	97.1
TP89784	chr2H	100	64	0	0	1	64	739613610	739613673	2e-25	119
TP19073	chr2H	98.44	64	1	0	1	64	739624100	739624163	1e-23	113
TP51488	chr2H	100	64	0	0	1	64	739666943	739667006	2e-25	119
TP46593	chr2H	100	64	0	0	1	64	739997857	739997794	2e-25	119
TP50977	chr2H	94.44	54	1	2	1	54	740348208	740348259	3e-14	82.4
TP57997	chr2H	98.44	64	1	0	1	64	740677572	740677509	1e-23	113
TP88652	chr2H	100	64	0	0	1	64	740914338	740914401	2e-25	119
TP47255	chr2H	98.44	64	1	0	1	64	741108127	741108064	1e-23	113
TP21683	chr2H	98.44	64	1	0	1	64	741236722	741236659	1e-23	113
TP13097	chr2H	98.44	64	1	0	1	64	742271164	742271227	1e-23	113
TP12269	chr2H	100	61	0	0	1	61	742280473	742280413	1e-23	113
TP87638	chr2H	100	60	0	0	1	60	742845231	742845290	4e-23	111
TP9289	chr2H	100	64	0	0	1	64	742845234	742845171	2e-25	119
TP7991	chr2H	98.44	64	1	0	1	64	743356551	743356614	1e-23	113
TP73878	chr2H	100	64	0	0	1	64	743496211	743496274	2e-25	119
TP92578	chr2H	98.44	64	1	0	1	64	743496214	743496151	1e-23	113
TP58679	chr2H	100	40	0	0	1	40	743640989	743641028	5e-12	75
TP36105	chr2H	98.44	64	1	0	1	64	743759569	743759506	1e-23	113
TP84799	chr2H	100	64	0	0	1	64	743766927	743766864	2e-25	119
TP65664	chr2H	98.44	64	1	0	1	64	744273047	744272984	1e-23	113
TP38701	chr2H	98.44	64	1	0	1	64	744663513	744663576	1e-23	113
TP27263	chr2H	96.77	62	1	1	1	61	744728244	744728183	2e-20	102
TP16816	chr2H	100	64	0	0	1	64	745072971	745072908	2e-25	119
TP82493-TP81950	chr2H	100	64	0	0	1	64	745314977	745314914	2e-25	119	QPlum.CW-2H.3
TP7121	chr2H	100	64	0	0	1	64	745316014	745316077	2e-25	119
TP57001	chr2H	100	40	0	0	1	40	745976723	745976762	5e-12	75
TP13772	chr2H	98.44	64	1	0	1	64	746256360	746256423	1e-23	113
TP101062	chr2H	100	64	0	0	1	64	746267136	746267199	2e-25	119
TP31798	chr2H	98.44	64	1	0	1	64	746371650	746371713	1e-23	113
TP7108	chr2H	100	64	0	0	1	64	746372553	746372616	2e-25	119
TP81950	chr2H	96	50	2	0	1	50	748648645	748648596	3e-14	82.4
TP55991	chr2H	98.36	61	1	0	1	61	748821317	748821257	5e-22	108
TP70872	chr2H	100	64	0	0	1	64	748987518	748987581	2e-25	119
TP1257	chr2H	100	64	0	0	1	64	749602979	749602916	2e-25	119
TP59036	chr2H	100	55	0	0	1	55	749820078	749820132	2e-20	102
TP60211	chr2H	100	57	0	0	1	57	749858674	749858730	2e-21	106
TP20861	chr2H	100	64	0	0	1	64	750115262	750115325	2e-25	119
TP44160	chr2H	100	64	0	0	1	64	750531409	750531346	2e-25	119
TP102291	chr2H	100	64	0	0	1	64	750628576	750628639	2e-25	119
TP8525	chr2H	98.44	64	1	0	1	64	750825532	750825595	1e-23	113
TP37537	chr2H	100	64	0	0	1	64	750974537	750974600	2e-25	119
TP73297	chr2H	98.44	64	1	0	1	64	750990114	750990177	1e-23	113
TP100391	chr2H	100	35	0	0	30	64	751011896	751011930	3e-09	65.8
TP35960	chr2H	100	64	0	0	1	64	751061665	751061728	2e-25	119
TP60198	chr2H	98.44	64	1	0	1	64	751201055	751200992	1e-23	113
TP28662	chr2H	98.44	64	1	0	1	64	751637704	751637641	1e-23	113
TP76990	chr2H	100	56	0	0	1	56	751895433	751895378	6e-21	104
TP54905	chr2H	98.44	64	1	0	1	64	751898466	751898403	1e-23	113
TP2329	chr2H	98.44	64	1	0	1	64	751976256	751976319	1e-23	113
TP1028	chr2H	98.44	64	1	0	1	64	752003053	752003116	1e-23	113
TP4682	chr2H	100	64	0	0	1	64	752343178	752343241	2e-25	119
TP80862	chr2H	97.78	45	1	0	1	45	752595075	752595119	4e-13	78.7
TP29657	chr2H	98.44	64	1	0	1	64	752978241	752978178	1e-23	113
TP86932	chr2H	98.44	64	1	0	1	64	754781475	754781538	1e-23	113
TP60380	chr2H	97.83	46	1	0	1	46	754781478	754781433	1e-13	80.5
TP16924	chr2H	100	48	0	0	1	48	755005866	755005913	2e-16	89.8
TP26406	chr2H	98.44	64	1	0	1	64	755054220	755054283	1e-23	113
TP61989	chr2H	98.44	64	1	0	1	64	755180346	755180283	1e-23	113
TP4171	chr2H	98.44	64	1	0	1	64	757113840	757113903	1e-23	113
TP26285	chr2H	100	48	0	0	1	48	757113843	757113796	2e-16	89.8
TP16308	chr2H	98.44	64	1	0	1	64	757389476	757389539	1e-23	113
TP13606	chr2H	100	64	0	0	1	64	757745940	757745877	2e-25	119
TP11989	chr2H	98.44	64	1	0	1	64	757820052	757819989	1e-23	113
TP78795	chr2H	98.44	64	1	0	1	64	758323070	758323133	1e-23	113
TP93117	chr2H	100	64	0	0	1	64	758323073	758323010	2e-25	119
TP63038	chr2H	100	64	0	0	1	64	758557312	758557249	2e-25	119
TP60803	chr2H	100	62	0	0	1	62	758575221	758575160	3e-24	115
TP73279	chr2H	100	64	0	0	1	64	758650186	758650123	2e-25	119
TP69517	chr2H	98.44	64	1	0	1	64	758717402	758717465	1e-23	113
TP26676	chr2H	98.44	64	1	0	1	64	758851180	758851243	1e-23	113
TP89866	chr2H	98.44	64	1	0	1	64	758921948	758921885	1e-23	113
TP66364	chr2H	100	39	0	0	1	39	759011703	759011741	2e-11	73.1
TP96194	chr2H	98.44	64	1	0	1	64	759410320	759410257	1e-23	113
TP75530	chr2H	88.52	61	7	0	4	64	759785134	759785074	5e-12	75
TP52089	chr2H	100	64	0	0	1	64	759834425	759834362	2e-25	119
TP18263	chr2H	100	64	0	0	1	64	760113354	760113417	2e-25	119
TP85800	chr2H	98.44	64	1	0	1	64	760113357	760113294	1e-23	113
TP85986	chr2H	100	64	0	0	1	64	760184530	760184467	2e-25	119
TP49785	chr2H	98.44	64	1	0	1	64	760246184	760246121	1e-23	113
TP100958	chr2H	98.08	52	1	0	1	52	760247179	760247128	5e-17	91.6
TP29158	chr2H	100	64	0	0	1	64	760941659	760941722	2e-25	119
TP21065	chr2H	98.44	64	1	0	1	64	760981752	760981689	1e-23	113
TP25495	chr2H	100	41	0	0	1	41	761576583	761576543	1e-12	76.8
TP69507	chr2H	98.44	64	1	0	1	64	762183733	762183796	1e-23	113
TP93863	chr2H	100	64	0	0	1	64	762195711	762195648	2e-25	119
TP10101	chr2H	100	64	0	0	1	64	762246647	762246710	2e-25	119
TP39630	chr2H	100	61	0	0	1	61	762295857	762295797	1e-23	113
TP90079	chr2H	100	63	0	0	1	63	762529038	762529100	8e-25	117
TP60885	chr2H	100	64	0	0	1	64	762829018	762828955	2e-25	119
TP68533	chr2H	98.41	63	1	0	1	63	762951167	762951105	4e-23	111
TP73003	chr2H	97.92	48	1	0	1	48	763607663	763607616	8e-15	84.2
TP28727	chr2H	100	64	0	0	1	64	763962678	763962741	2e-25	119
TP98486	chr2H	100	64	0	0	1	64	763971356	763971293	2e-25	119
TP50940	chr2H	100	64	0	0	1	64	764088493	764088556	2e-25	119
TP42511	chr2H	98.44	64	1	0	1	64	764088496	764088433	1e-23	113
TP81947	chr2H	96.55	58	1	1	1	58	764122470	764122414	4e-18	95.3
TP1071	chr2H	98.44	64	1	0	1	64	764286584	764286647	1e-23	113
TP49410	chr2H	100	63	0	0	1	63	764361909	764361847	8e-25	117
TP83719	chr2H	100	64	0	0	1	64	764422198	764422261	2e-25	119
TP86573	chr2H	100	64	0	0	1	64	765154884	765154947	2e-25	119
TP92369	chr2H	100	64	0	0	1	64	765158600	765158537	2e-25	119
TP19866	chr2H	98.15	54	1	0	1	54	765536061	765536008	4e-18	95.3
TP33675	chr2H	100	61	0	0	1	61	765606407	765606347	1e-23	113
TP47886	chr2H	100	61	0	0	1	61	766313731	766313791	1e-23	113
TP13625	chr2H	100	64	0	0	1	64	767326713	767326650	2e-25	119
TP81787	chr2H	98.44	64	1	0	1	64	767371782	767371719	1e-23	113
TP78185	chr3H	98.44	64	1	0	1	64	4889	4952	1e-23	113
TP30203	chr3H	98.18	55	1	0	1	55	678312	678258	1e-18	97.1	QNDVI.CW-3H.1
TP19083	chr3H	100	64	0	0	1	64	1643608	1643545	2e-25	119
TP28466	chr3H	97.83	46	1	0	1	46	1656171	1656216	1e-13	80.5
TP27050	chr3H	98.31	59	1	0	1	59	1966341	1966399	6e-21	104
TP11238	chr3H	98.44	64	1	0	1	64	1966344	1966281	1e-23	113
TP42238	chr3H	100	64	0	0	1	64	2015549	2015486	2e-25	119
TP40772	chr3H	100	64	0	0	1	64	2260017	2260080	2e-25	119
TP35262	chr3H	97.62	42	1	0	1	42	2337526	2337567	2e-11	73.1
TP64110	chr3H	100	64	0	0	1	64	2471255	2471318	2e-25	119
TP19838	chr3H	98.44	64	1	0	1	64	2815867	2815804	1e-23	113
TP25296	chr3H	100	64	0	0	1	64	2892222	2892159	2e-25	119
TP50463	chr3H	100	46	0	0	1	46	3242636	3242681	2e-15	86.1
TP33939	chr3H	98.44	64	1	0	1	64	3273678	3273615	1e-23	113
TP87034	chr3H	100	47	0	0	1	47	3491118	3491072	6e-16	87.9
TP14580	chr3H	98.44	64	1	0	1	64	3535015	3535078	1e-23	113
TP10702	chr3H	97.83	46	1	0	1	46	3536358	3536313	1e-13	80.5
TP29121	chr3H	98.44	64	1	0	1	64	3546087	3546024	1e-23	113
TP32818	chr3H	100	64	0	0	1	64	3557253	3557190	2e-25	119
TP80532	chr3H	98.44	64	1	0	1	64	3957826	3957889	1e-23	113
TP57015	chr3H	98.44	64	1	0	1	64	3973798	3973735	1e-23	113
TP21231	chr3H	100	48	0	0	1	48	4053715	4053762	2e-16	89.8
TP57908	chr3H	98.44	64	1	0	1	64	4069737	4069800	1e-23	113
TP29016	chr3H	100	64	0	0	1	64	4069740	4069677	2e-25	119
TP3533	chr3H	100	64	0	0	1	64	6607572	6607509	2e-25	119
TP43504	chr3H	100	64	0	0	1	64	6882641	6882704	2e-25	119
TP63272	chr3H	97.73	44	0	1	1	44	6882644	6882602	5e-12	75
TP88079	chr3H	100	64	0	0	1	64	7478418	7478481	2e-25	119
TP89029	chr3H	100	40	0	0	1	40	7691609	7691570	5e-12	75
TP16774	chr3H	100	64	0	0	1	64	7709451	7709514	2e-25	119
TP24720	chr3H	98.31	59	1	0	1	59	7792561	7792503	6e-21	104
TP22631	chr3H	100	45	0	0	1	45	8026767	8026723	8e-15	84.2
TP10739	chr3H	100	64	0	0	1	64	8258461	8258524	2e-25	119
TP18680	chr3H	96.88	64	2	0	1	64	9043221	9043158	5e-22	108
TP11179	chr3H	98.44	64	1	0	1	64	10358936	10358873	1e-23	113
TP70492	chr3H	100	61	0	0	1	61	10979547	10979487	1e-23	113
TP53326	chr3H	100	64	0	0	1	64	11176175	11176238	2e-25	119
TP70652	chr3H	98.44	64	1	0	1	64	11631709	11631646	1e-23	113
TP27189	chr3H	96.83	63	2	0	2	64	11632215	11632277	2e-21	106
TP58426	chr3H	98.46	65	0	1	1	64	11825482	11825546	1e-23	113
TP43186	chr3H	100	45	0	0	1	45	11968146	11968190	8e-15	84.2
TP10555	chr3H	98.44	64	1	0	1	64	12402809	12402872	1e-23	113
TP15517	chr3H	98.31	59	1	0	1	59	12499133	12499191	6e-21	104
TP22471	chr3H	100	48	0	0	1	48	12499136	12499089	2e-16	89.8
TP93991	chr3H	95.31	64	3	0	1	64	13107711	13107774	2e-20	102
TP61895	chr3H	98.44	64	1	0	1	64	13182120	13182183	1e-23	113
TP73049	chr3H	98.44	64	1	0	1	64	13222278	13222215	1e-23	113
TP102686	chr3H	100	64	0	0	1	64	13262634	13262697	2e-25	119
TP81820	chr3H	98.44	64	1	0	1	64	13436442	13436379	1e-23	113
TP84864	chr3H	100	64	0	0	1	64	13456704	13456641	2e-25	119
TP50819	chr3H	96.88	64	1	1	1	63	13457552	13457489	2e-21	106
TP58634	chr3H	100	50	0	0	1	50	13482792	13482841	1e-17	93.5
TP17904	chr3H	98.44	64	1	0	1	64	13666604	13666667	1e-23	113
TP17481	chr3H	98.44	64	1	0	1	64	13969384	13969447	1e-23	113
TP93544	chr3H	100	64	0	0	1	64	14118099	14118036	2e-25	119
TP17983	chr3H	96.88	64	2	0	1	64	14939934	14939871	5e-22	108
TP27368	chr3H	98.44	64	1	0	1	64	14954787	14954850	1e-23	113
TP89060	chr3H	98.44	64	1	0	1	64	15200127	15200064	1e-23	113
TP84491	chr3H	98.44	64	1	0	1	64	15469446	15469509	1e-23	113
TP43501	chr3H	95.65	46	2	0	1	46	15894790	15894835	5e-12	75
TP52780	chr3H	100	64	0	0	1	64	16463670	16463733	2e-25	119
TP87987	chr3H	98.44	64	1	0	1	64	16599468	16599531	1e-23	113
TP81153	chr3H	100	52	0	0	1	52	16599471	16599420	1e-18	97.1
TP101557	chr3H	98.44	64	1	0	1	64	16616193	16616256	1e-23	113
TP9332	chr3H	100	40	0	0	1	40	16624040	16624079	5e-12	75
TP30030	chr3H	98.44	64	1	0	1	64	17350944	17351007	1e-23	113
TP57024	chr3H	98.44	64	1	0	1	64	17350947	17350884	1e-23	113
TP66939	chr3H	100	64	0	0	1	64	17362817	17362754	2e-25	119
TP69106	chr3H	98.04	51	1	0	1	51	17459091	17459141	2e-16	89.8
TP28781	chr3H	100	64	0	0	1	64	17464392	17464329	2e-25	119
TP22959	chr3H	98.44	64	1	0	1	64	17534649	17534712	1e-23	113
TP88574	chr3H	100	62	0	0	1	62	17583776	17583715	3e-24	115
TP12439	chr3H	100	64	0	0	1	64	17672114	17672177	2e-25	119
TP50907	chr3H	96.49	57	2	0	1	57	18016626	18016682	4e-18	95.3
TP23662	chr3H	100	64	0	0	1	64	18330754	18330817	2e-25	119
TP65905	chr3H	100	64	0	0	1	64	18603334	18603271	2e-25	119
TP17554	chr3H	98.36	61	1	0	1	61	18610442	18610382	5e-22	108
TP76334	chr3H	100	55	0	0	1	55	18730844	18730898	2e-20	102
TP40625	chr3H	100	64	0	0	1	64	19193575	19193638	2e-25	119
TP12229	chr3H	100	64	0	0	1	64	19853517	19853580	2e-25	119
TP21611	chr3H	100	64	0	0	1	64	19903684	19903747	2e-25	119
TP44394	chr3H	98.44	64	1	0	1	64	20091099	20091162	1e-23	113
TP28565	chr3H	98.44	64	1	0	1	64	20408012	20407949	1e-23	113
TP61926	chr3H	100	64	0	0	1	64	20562303	20562366	2e-25	119
TP33244	chr3H	98.44	64	1	0	1	64	21017585	21017522	1e-23	113
TP47445	chr3H	100	55	0	0	1	55	24705717	24705771	2e-20	102
TP97023	chr3H	98.44	64	1	0	1	64	25247461	25247398	1e-23	113
TP67667	chr3H	100	64	0	0	1	64	25506457	25506520	2e-25	119
TP97664	chr3H	100	64	0	0	1	64	25541749	25541686	2e-25	119
TP11877	chr3H	100	64	0	0	1	64	26144692	26144755	2e-25	119
TP25582	chr3H	100	64	0	0	1	64	26149974	26149911	2e-25	119
TP73082	chr3H	98.44	64	1	0	1	64	27743730	27743793	1e-23	113
TP89527	chr3H	100	42	0	0	1	42	27816183	27816224	4e-13	78.7
TP45666	chr3H	98.25	57	1	0	1	57	28022254	28022198	8e-20	100
TP45667	chr3H	98.25	57	1	0	1	57	28022254	28022198	8e-20	100
TP49067	chr3H	100	61	0	0	1	61	30122571	30122511	1e-23	113
TP38509	chr3H	100	64	0	0	1	64	30369884	30369947	2e-25	119
TP93049	chr3H	98.44	64	1	0	1	64	32680266	32680203	1e-23	113
TP47916	chr3H	96.88	64	2	0	1	64	35039299	35039362	5e-22	108
TP29580	chr3H	98.44	64	1	0	1	64	46394788	46394851	1e-23	113
TP23645	chr3H	98.44	64	1	0	1	64	49148872	49148809	1e-23	113
TP73136	chr3H	98.44	64	1	0	1	64	49280222	49280159	1e-23	113
TP65721	chr3H	100	57	0	0	1	57	50337360	50337416	2e-21	106
TP14404	chr3H	98.33	60	1	0	1	60	50398634	50398693	2e-21	106
TP99441	chr3H	100	64	0	0	1	64	50398874	50398937	2e-25	119
TP62354-TP5718	chr3H	98.44	64	1	0	1	64	51808757	51808820	1e-23	113	QPlum.CW-3H
TP72643	chr3H	98.04	51	1	0	1	51	52183098	52183148	2e-16	89.8
TP47486	chr3H	100	54	0	0	1	54	58961173	58961226	8e-20	100
TP23998	chr3H	100	64	0	0	1	64	67424202	67424139	2e-25	119
HvGI_3820	chr3H	100	201	0	0	1	201	67425329	67425529	7e-101	372
TP82099	chr3H	97.73	44	0	1	1	44	68095624	68095666	5e-12	75
TP42450	chr3H	98.44	64	1	0	1	64	68838194	68838257	1e-23	113
TP18681	chr3H	98.44	64	1	0	1	64	68838197	68838134	1e-23	113
TP5989	chr3H	100	64	0	0	1	64	68843594	68843531	2e-25	119
TP61688	chr3H	100	64	0	0	1	64	69610300	69610363	2e-25	119
TP100005	chr3H	100	64	0	0	1	64	69675490	69675427	2e-25	119
TP23971	chr3H	100	64	0	0	1	64	72118792	72118729	2e-25	119
TP52249	chr3H	100	45	0	0	1	45	73142203	73142247	8e-15	84.2
TP12299	chr3H	98.44	64	1	0	1	64	75014847	75014784	1e-23	113
TP92887	chr3H	100	42	0	0	1	42	76045297	76045338	4e-13	78.7
TP37348	chr3H	100	64	0	0	1	64	77078235	77078172	2e-25	119
TP5718	chr3H	98.44	64	1	0	1	64	77469208	77469271	1e-23	113
TP5709	chr3H	98.44	64	1	0	1	64	77501296	77501359	1e-23	113
TP45641	chr3H	98.44	64	1	0	1	64	77503365	77503302	1e-23	113
TP92577	chr3H	98.44	64	1	0	1	64	79220074	79220137	1e-23	113
TP64925	chr3H	100	44	0	0	1	44	79426100	79426143	3e-14	82.4
TP5118	chr3H	100	64	0	0	1	64	82839932	82839995	2e-25	119
TP64172	chr3H	98.44	64	1	0	1	64	84974979	84974916	1e-23	113
TP32978	chr3H	100	64	0	0	1	64	85392650	85392587	2e-25	119
TP80830	chr3H	98.11	53	1	0	1	53	90561243	90561295	1e-17	93.5
TP38944	chr3H	100	64	0	0	1	64	90897264	90897327	2e-25	119
TP36159	chr3H	100	54	0	0	1	54	91367944	91367891	8e-20	100
TP36160	chr3H	100	54	0	0	1	54	91367944	91367891	8e-20	100
TP31617	chr3H	100	57	0	0	1	57	98512632	98512576	2e-21	106
TP41440	chr3H	100	64	0	0	1	64	102044112	102044175	2e-25	119
TP14145	chr3H	100	64	0	0	1	64	104251255	104251192	2e-25	119
TP71232	chr3H	100	64	0	0	1	64	104708879	104708942	2e-25	119
TP28479	chr3H	100	64	0	0	1	64	104709111	104709048	2e-25	119
TP17887	chr3H	98.44	64	1	0	1	64	104934088	104934151	1e-23	113
TP24132	chr3H	98.44	64	1	0	1	64	105425661	105425724	1e-23	113
TP89379	chr3H	100	64	0	0	1	64	105641351	105641414	2e-25	119
TP55839	chr3H	100	42	0	0	1	42	109078618	109078659	4e-13	78.7
TP27654	chr3H	100	64	0	0	1	64	123315249	123315186	2e-25	119
TP50967	chr3H	100	62	0	0	1	62	127424256	127424195	3e-24	115
TP94161	chr3H	100	64	0	0	1	64	144832224	144832287	2e-25	119
TP48105	chr3H	100	53	0	0	1	53	144981008	144980956	3e-19	99
TP86511	chr3H	100	64	0	0	1	64	146265092	146265155	2e-25	119
TP54020	chr3H	98.44	64	1	0	1	64	146938011	146937948	1e-23	113
TP72355	chr3H	100	40	0	0	1	40	147704416	147704455	5e-12	75
TP22750	chr3H	100	49	0	0	1	49	148298595	148298643	5e-17	91.6
TP97635	chr3H	100	64	0	0	1	64	151436010	151436073	2e-25	119
TP47268	chr3H	100	41	0	0	1	41	156216233	156216273	1e-12	76.8
TP80307	chr3H	100	64	0	0	1	64	164561463	164561526	2e-25	119
TP60218	chr3H	100	64	0	0	1	64	164561466	164561403	2e-25	119
TP44925	chr3H	100	44	0	0	1	44	164594233	164594276	3e-14	82.4
TP64195	chr3H	100	64	0	0	1	64	168045441	168045378	2e-25	119
TP86644	chr3H	100	64	0	0	1	64	170986441	170986378	2e-25	119
TP38256	chr3H	100	64	0	0	1	64	171289255	171289318	2e-25	119
TP53079	chr3H	98.44	64	1	0	1	64	185738758	185738695	1e-23	113
TP90294	chr3H	98.44	64	1	0	1	64	185786453	185786516	1e-23	113
TP32261	chr3H	100	64	0	0	1	64	189959254	189959191	2e-25	119
TP19110	chr3H	100	64	0	0	1	64	198438163	198438226	2e-25	119
TP82565	chr3H	98.44	64	1	0	1	64	201617104	201617041	1e-23	113
TP102048	chr3H	100	63	0	0	1	63	208392484	208392422	8e-25	117
TP38014	chr3H	100	64	0	0	1	64	209710626	209710563	2e-25	119
TP68213	chr3H	100	64	0	0	1	64	211592153	211592090	2e-25	119
TP90138	chr3H	100	64	0	0	1	64	211871944	211872007	2e-25	119
TP100791	chr3H	100	64	0	0	1	64	212015727	212015664	2e-25	119
TP89162	chr3H	98.44	64	1	0	1	64	212193369	212193432	1e-23	113
TP30394	chr3H	100	64	0	0	1	64	215414699	215414636	2e-25	119
TP71229	chr3H	98.44	64	1	0	1	64	220317738	220317675	1e-23	113
TP88219	chr3H	100	64	0	0	1	64	221289295	221289232	2e-25	119
TP22010	chr3H	100	64	0	0	1	64	224354851	224354914	2e-25	119
TP34091	chr3H	100	64	0	0	1	64	225402912	225402849	2e-25	119
TP49244	chr3H	100	64	0	0	1	64	226388506	226388569	2e-25	119
TP87191	chr3H	98.44	64	1	0	1	64	226483115	226483178	1e-23	113
TP47639	chr3H	100	62	0	0	1	62	226692902	226692841	3e-24	115
TP26583	chr3H	98.44	64	1	0	1	64	230719773	230719710	1e-23	113
TP96204	chr3H	98.44	64	1	0	1	64	237996822	237996885	1e-23	113
TP48676	chr3H	98.18	55	1	0	1	55	238809658	238809712	1e-18	97.1
TP99791	chr3H	100	60	0	0	1	60	243082031	243081972	4e-23	111
TP33343	chr3H	100	47	0	0	1	47	244126447	244126401	6e-16	87.9
TP48141	chr3H	97.87	47	1	0	1	47	245107675	245107629	3e-14	82.4
TP45171	chr3H	98.44	64	1	0	1	64	247248882	247248945	1e-23	113
TP92152	chr3H	97.83	46	1	0	1	46	247377223	247377178	1e-13	80.5
TP21555	chr3H	100	64	0	0	1	64	249834107	249834044	2e-25	119
TP34486	chr3H	97.56	41	1	0	1	41	250948547	250948507	6e-11	71.3
TP55409	chr3H	98	50	1	0	1	50	255874994	255875043	6e-16	87.9
TP25828	chr3H	97.37	38	1	0	1	38	256653179	256653142	3e-09	65.8
TP36494	chr3H	100	64	0	0	1	64	258284101	258284038	2e-25	119
TP4167	chr3H	100	64	0	0	1	64	260967855	260967918	2e-25	119
TP66131	chr3H	98.44	64	1	0	1	64	260967858	260967795	1e-23	113
TP87171	chr3H	100	64	0	0	1	64	263725165	263725102	2e-25	119
TP36474	chr3H	98.11	53	1	0	1	53	266337199	266337251	1e-17	93.5
TP37340	chr3H	100	64	0	0	1	64	267037248	267037185	2e-25	119
TP4593	chr3H	100	64	0	0	1	64	267700374	267700437	2e-25	119
TP27032	chr3H	98.44	64	1	0	1	64	269937965	269938028	1e-23	113
TP60662	chr3H	100	64	0	0	1	64	270290010	270290073	2e-25	119
TP41106	chr3H	98.44	64	1	0	1	64	273460458	273460521	1e-23	113
TP35264	chr3H	100	64	0	0	1	64	273880198	273880135	2e-25	119
TP42442	chr3H	100	64	0	0	1	64	274171695	274171758	2e-25	119
TP42249	chr3H	95.74	47	2	0	1	47	276474725	276474679	1e-12	76.8
TP87686	chr3H	100	64	0	0	1	64	281861250	281861187	2e-25	119
TP7861	chr3H	98.44	64	1	0	1	64	283266583	283266520	1e-23	113
TP45765	chr3H	98.44	64	1	0	1	64	284373083	284373146	1e-23	113
TP100028	chr3H	98.44	64	1	0	1	64	284722947	284722884	1e-23	113
TP51707	chr3H	98.44	64	1	0	1	64	285635373	285635310	1e-23	113
TP14897	chr3H	100	64	0	0	1	64	288897714	288897651	2e-25	119
TP80781	chr3H	100	64	0	0	1	64	290795027	290795090	2e-25	119
TP31806	chr3H	100	40	0	0	1	40	291831460	291831421	5e-12	75
TP24550	chr3H	98.44	64	1	0	1	64	293337760	293337697	1e-23	113
TP46175	chr3H	100	64	0	0	1	64	298550965	298551028	2e-25	119
TP58717	chr3H	100	55	0	0	1	55	298550968	298550914	2e-20	102
TP58718	chr3H	100	55	0	0	1	55	298550968	298550914	2e-20	102
TP26546	chr3H	100	64	0	0	1	64	299421039	299421102	2e-25	119
TP24026	chr3H	98.44	64	1	0	1	64	301696133	301696196	1e-23	113
TP21996	chr3H	98.44	64	1	0	1	64	303536446	303536509	1e-23	113
TP30425	chr3H	100	64	0	0	1	64	304616897	304616834	2e-25	119
TP61831	chr3H	100	61	0	0	1	61	305372826	305372886	1e-23	113
TP28754	chr3H	98.44	64	1	0	1	64	305744033	305743970	1e-23	113
TP86606	chr3H	100	61	0	0	1	61	305748007	305748067	1e-23	113
TP22646	chr3H	100	64	0	0	1	64	305777544	305777481	2e-25	119
TP75850	chr3H	98.46	65	0	1	1	64	306384309	306384373	1e-23	113
TP52529	chr3H	100	64	0	0	1	64	307608609	307608672	2e-25	119
TP30744	chr3H	98.11	53	1	0	1	53	310557987	310557935	1e-17	93.5
TP102693	chr3H	100	64	0	0	1	64	312508611	312508674	2e-25	119
TP89764	chr3H	98.36	61	0	1	1	61	313797878	313797819	2e-21	106
TP38169	chr3H	100	64	0	0	1	64	314207042	314206979	2e-25	119
TP89111	chr3H	100	64	0	0	1	64	315705371	315705434	2e-25	119
TP25841	chr3H	100	64	0	0	1	64	315713829	315713766	2e-25	119
TP17658	chr3H	100	64	0	0	1	64	317158629	317158692	2e-25	119
TP18193	chr3H	100	64	0	0	1	64	317361273	317361210	2e-25	119
TP23927	chr3H	100	39	0	0	1	39	317382953	317382915	2e-11	73.1
TP34915	chr3H	98.44	64	1	0	1	64	321780056	321780119	1e-23	113
TP59309	chr3H	98.44	64	1	0	1	64	322921634	322921697	1e-23	113
TP47068	chr3H	98.25	57	1	0	1	57	322921637	322921581	8e-20	100
TP34777	chr3H	100	42	0	0	1	42	323897572	323897613	4e-13	78.7
TP35121	chr3H	98.44	64	1	0	1	64	324712510	324712573	1e-23	113
TP37431	chr3H	100	39	0	0	1	39	325051232	325051270	2e-11	73.1
TP94234	chr3H	98.25	57	1	0	1	57	328641844	328641900	8e-20	100
TP102663	chr3H	100	64	0	0	1	64	329759878	329759941	2e-25	119
TP29771	chr3H	98.44	64	1	0	1	64	332438031	332437968	1e-23	113
TP68861	chr3H	100	64	0	0	1	64	334373250	334373313	2e-25	119
TP101261	chr3H	100	64	0	0	1	64	334859922	334859985	2e-25	119
TP32887	chr3H	100	46	0	0	2	47	335475136	335475181	2e-15	86.1
TP55175	chr3H	98.44	64	1	0	1	64	338640713	338640776	1e-23	113
TP51716	chr3H	98.28	58	1	0	1	58	340436311	340436254	2e-20	102
TP44537	chr3H	100	61	0	0	1	61	341283526	341283466	1e-23	113
TP98655	chr3H	100	63	0	0	1	63	343268170	343268232	8e-25	117
TP26190	chr3H	100	64	0	0	1	64	343668456	343668393	2e-25	119
TP89925	chr3H	98.44	64	1	0	1	64	354508913	354508976	1e-23	113
TP56454	chr3H	100	64	0	0	1	64	355822663	355822726	2e-25	119
TP40095	chr3H	100	64	0	0	1	64	360867476	360867413	2e-25	119
TP25027	chr3H	100	64	0	0	1	64	360950837	360950900	2e-25	119
TP91986	chr3H	100	64	0	0	1	64	364646748	364646811	2e-25	119
TP69506	chr3H	98.39	62	1	0	3	64	365131974	365131913	1e-22	110
TP36870	chr3H	98.44	64	1	0	1	64	366792480	366792543	1e-23	113
TP94521	chr3H	98.44	64	1	0	1	64	371449743	371449806	1e-23	113
TP81960	chr3H	100	64	0	0	1	64	372331148	372331085	2e-25	119
TP60186	chr3H	100	64	0	0	1	64	372477041	372477104	2e-25	119
TP92274	chr3H	100	64	0	0	1	64	373106665	373106602	2e-25	119
TP95124	chr3H	100	64	0	0	1	64	373490502	373490439	2e-25	119
TP73724	chr3H	98.44	64	1	0	1	64	373681979	373681916	1e-23	113
TP24101	chr3H	98.44	64	1	0	1	64	378104538	378104601	1e-23	113
TP39954	chr3H	100	52	0	0	1	52	378186319	378186268	1e-18	97.1
TP77814	chr3H	100	50	0	0	1	50	379578150	379578199	1e-17	93.5
TP4121	chr3H	98.44	64	1	0	1	64	379578153	379578090	1e-23	113
TP31492	chr3H	100	64	0	0	1	64	380464022	380464085	2e-25	119
TP77784	chr3H	98.44	64	1	0	1	64	381160338	381160275	1e-23	113
TP95824	chr3H	100	59	0	0	1	59	381442578	381442636	1e-22	110
TP88792	chr3H	98.25	57	1	0	1	57	385025022	385024966	8e-20	100
TP89423	chr3H	100	64	0	0	1	64	390003682	390003619	2e-25	119
TP64363	chr3H	98.44	64	1	0	1	64	391982733	391982670	1e-23	113
TP18483	chr3H	100	64	0	0	1	64	392094940	392094877	2e-25	119
TP10261	chr3H	98.44	64	1	0	1	64	393570972	393571035	1e-23	113
TP24168	chr3H	97.96	49	1	0	1	49	395601788	395601836	2e-15	86.1
TP86924	chr3H	100	64	0	0	1	64	395633812	395633875	2e-25	119
TP21868	chr3H	98.44	64	1	0	1	64	396059721	396059784	1e-23	113
TP96562	chr3H	98.44	64	1	0	1	64	397457712	397457775	1e-23	113
TP9875	chr3H	98.44	64	1	0	1	64	398203930	398203867	1e-23	113
TP98817	chr3H	98.44	64	1	0	1	64	398457177	398457114	1e-23	113
TP47575	chr3H	98.44	64	1	0	1	64	400306542	400306479	1e-23	113
TP66735	chr3H	98.44	64	1	0	1	64	401547656	401547593	1e-23	113
TP6174	chr3H	91.94	62	2	3	1	62	401717940	401717998	8e-15	84.2
TP96593	chr3H	100	64	0	0	1	64	401813789	401813852	2e-25	119
TP34445	chr3H	100	57	0	0	1	57	402902663	402902719	2e-21	106
TP34446	chr3H	98.36	61	1	0	1	61	402902663	402902723	5e-22	108
TP76110	chr3H	100	64	0	0	1	64	404678490	404678553	2e-25	119
TP100578	chr3H	98.44	64	1	0	1	64	405730753	405730690	1e-23	113
TP94247	chr3H	98.44	64	1	0	1	64	408287732	408287795	1e-23	113
TP23145	chr3H	98.44	64	1	0	1	64	410411800	410411863	1e-23	113
TP4390	chr3H	98.44	64	1	0	1	64	411479547	411479484	1e-23	113
TP15310	chr3H	100	64	0	0	1	64	412435884	412435947	2e-25	119
TP6462	chr3H	98.44	64	1	0	1	64	412437207	412437144	1e-23	113
TP95991	chr3H	100	64	0	0	1	64	412746891	412746954	2e-25	119
TP22358	chr3H	100	64	0	0	1	64	414811459	414811522	2e-25	119
TP71447	chr3H	100	64	0	0	1	64	415363493	415363430	2e-25	119
TP78711	chr3H	100	64	0	0	1	64	418131825	418131762	2e-25	119
TP32337	chr3H	100	64	0	0	1	64	419608222	419608285	2e-25	119
TP91095	chr3H	100	64	0	0	1	64	420069172	420069235	2e-25	119
TP31238	chr3H	100	46	0	0	1	46	428994690	428994735	2e-15	86.1
TP47441	chr3H	98.44	64	1	0	1	64	434100484	434100421	1e-23	113
TP17657	chr3H	98.44	64	1	0	1	64	435390046	435389983	1e-23	113
TP88392	chr3H	100	64	0	0	1	64	438364476	438364413	2e-25	119
TP1638	chr3H	98.44	64	1	0	1	64	442454250	442454187	1e-23	113
TP101641	chr3H	100	64	0	0	1	64	442456666	442456603	2e-25	119
TP11433	chr3H	98.31	59	1	0	1	59	442563104	442563046	6e-21	104
TP60337	chr3H	97.78	45	0	1	1	45	443170413	443170370	1e-12	76.8
TP49565	chr3H	100	54	0	0	1	54	444098169	444098222	8e-20	100
TP65451	chr3H	100	64	0	0	1	64	444098172	444098109	2e-25	119
TP17104	chr3H	98.44	64	1	0	1	64	444130704	444130641	1e-23	113
TP92460	chr3H	100	64	0	0	1	64	445389582	445389645	2e-25	119	QLwax.FW-3H
TP19482	chr3H	98.44	64	1	0	1	64	445920785	445920722	1e-23	113
TP39394	chr3H	98.44	64	1	0	1	64	447787432	447787369	1e-23	113
TP71978	chr3H	100	55	0	0	1	55	448011699	448011753	2e-20	102
TP87177	chr3H	100	64	0	0	1	64	453703583	453703520	2e-25	119
TP48151	chr3H	100	47	0	0	1	47	456036073	456036027	6e-16	87.9
TP27745	chr3H	100	50	0	0	1	50	456078922	456078873	1e-17	93.5
TP40741	chr3H	98.44	64	1	0	1	64	459157300	459157363	1e-23	113
TP60981	chr3H	100	64	0	0	1	64	461783527	461783590	2e-25	119
TP94468	chr3H	100	64	0	0	1	64	464418964	464418901	2e-25	119
TP19619	chr3H	100	64	0	0	1	64	471330291	471330354	2e-25	119
TP34111	chr3H	100	64	0	0	1	64	476271385	476271322	2e-25	119
TP12550	chr3H	98.44	64	1	0	1	64	486895029	486895092	1e-23	113
TP72695	chr3H	100	64	0	0	1	64	487786535	487786598	2e-25	119
TP25035	chr3H	100	44	0	0	1	44	487948530	487948573	3e-14	82.4
TP6289	chr3H	100	64	0	0	1	64	488415041	488415104	2e-25	119
TP57643	chr3H	100	64	0	0	1	64	488714914	488714851	2e-25	119
TP51701	chr3H	98.44	64	1	0	1	64	490001487	490001424	1e-23	113
TP41814	chr3H	98.44	64	1	0	1	64	490003124	490003061	1e-23	113
TP41373	chr3H	98.44	64	1	0	1	64	490222733	490222670	1e-23	113
TP2518	chr3H	98.44	64	1	0	1	64	490245353	490245416	1e-23	113
TP15826	chr3H	100	64	0	0	1	64	490799668	490799731	2e-25	119
TP78132	chr3H	100	64	0	0	1	64	490805486	490805549	2e-25	119
TP70664	chr3H	100	50	0	0	1	50	491083346	491083395	1e-17	93.5
TP73802	chr3H	98.44	64	1	0	1	64	491085580	491085643	1e-23	113
TP88611	chr3H	97.96	49	1	0	1	49	491862863	491862911	2e-15	86.1
TP12587	chr3H	100	48	0	0	1	48	493050898	493050945	2e-16	89.8
TP53091	chr3H	98.41	63	1	0	1	63	496975329	496975391	4e-23	111
TP54441	chr3H	98.44	64	1	0	1	64	497561131	497561068	1e-23	113
TP62331	chr3H	98.04	51	1	0	1	51	498159938	498159888	2e-16	89.8
TP32381	chr3H	100	64	0	0	1	64	498708659	498708722	2e-25	119
TP14749	chr3H	100	64	0	0	1	64	498944712	498944649	2e-25	119
TP10416	chr3H	98.44	64	1	0	1	64	498961692	498961629	1e-23	113
TP82851	chr3H	100	61	0	0	1	61	501553247	501553307	1e-23	113
TP38772	chr3H	98.44	64	1	0	1	64	502045624	502045687	1e-23	113
TP53505	chr3H	97.5	40	1	0	1	40	502045627	502045588	2e-10	69.4
TP53506	chr3H	95.45	44	1	1	1	44	502045627	502045585	2e-10	69.4
TP57352	chr3H	100	64	0	0	1	64	502421284	502421221	2e-25	119
TP17478	chr3H	100	64	0	0	1	64	503102100	503102163	2e-25	119
TP90168	chr3H	98.44	64	1	0	1	64	503967801	503967864	1e-23	113
TP96627	chr3H	100	64	0	0	1	64	504097629	504097566	2e-25	119
TP5934	chr3H	98.44	64	1	0	1	64	505126150	505126087	1e-23	113
TP40099	chr3H	100	64	0	0	1	64	506168789	506168726	2e-25	119
TP73790	chr3H	100	61	0	0	1	61	506644648	506644588	1e-23	113
TP75732	chr3H	100	64	0	0	1	64	506941663	506941726	2e-25	119
TP66585	chr3H	98.44	64	1	0	1	64	506954792	506954729	1e-23	113
TP75477	chr3H	98.44	64	1	0	1	64	506959509	506959572	1e-23	113
TP24322	chr3H	100	57	0	0	1	57	506959512	506959456	2e-21	106
TP98999	chr3H	98.41	63	1	0	1	63	508406968	508407030	4e-23	111
TP87550	chr3H	98.44	64	1	0	1	64	508773657	508773720	1e-23	113
TP102410	chr3H	98.28	58	1	0	1	58	509017904	509017847	2e-20	102
TP66711	chr3H	98.44	64	1	0	1	64	509130659	509130722	1e-23	113
TP17605	chr3H	100	54	0	0	1	54	509145124	509145177	8e-20	100
TP76681	chr3H	98.44	64	1	0	1	64	511050267	511050204	1e-23	113
TP56096	chr3H	98.44	64	1	0	1	64	511052387	511052324	1e-23	113
TP36951	chr3H	95.74	47	1	1	1	46	511252494	511252540	5e-12	75
TP12260	chr3H	100	64	0	0	1	64	512678255	512678192	2e-25	119
TP10503	chr3H	100	64	0	0	1	64	514095493	514095556	2e-25	119
TP61041	chr3H	100	64	0	0	1	64	514095496	514095433	2e-25	119
TP39875	chr3H	98.44	64	1	0	1	64	515852504	515852567	1e-23	113
TP70088	chr3H	98.44	64	1	0	1	64	517321013	517321076	1e-23	113
TP84399	chr3H	98.44	64	1	0	1	64	517335636	517335699	1e-23	113
TP80953	chr3H	98.44	64	1	0	1	64	517543192	517543255	1e-23	113
TP13826	chr3H	98.44	64	1	0	1	64	517640021	517639958	1e-23	113
TP36261	chr3H	95.16	62	3	0	1	62	518313164	518313103	3e-19	99
TP34240	chr3H	100	64	0	0	1	64	518351513	518351576	2e-25	119
TP4967	chr3H	98.44	64	1	0	1	64	518355751	518355688	1e-23	113
TP81795	chr3H	98.44	64	1	0	1	64	518645506	518645443	1e-23	113
TP21443	chr3H	100	64	0	0	1	64	518663012	518662949	2e-25	119
TP8806	chr3H	98.44	64	1	0	1	64	519468513	519468576	1e-23	113
TP93155	chr3H	100	64	0	0	1	64	519523797	519523860	2e-25	119
TP8156	chr3H	98.44	64	1	0	1	64	520308492	520308429	1e-23	113
TP73811	chr3H	100	64	0	0	1	64	521092166	521092103	2e-25	119
TP100477	chr3H	100	64	0	0	1	64	521096001	521095938	2e-25	119
TP14846	chr3H	100	64	0	0	1	64	524265983	524265920	2e-25	119
TP91875	chr3H	98.44	64	1	0	1	64	526164271	526164208	1e-23	113
TP13416	chr3H	100	64	0	0	1	64	526482241	526482178	2e-25	119
TP101362	chr3H	98.44	64	1	0	1	64	527080087	527080024	1e-23	113
TP22072	chr3H	100	64	0	0	1	64	527297830	527297767	2e-25	119
TP31662	chr3H	100	64	0	0	1	64	527585477	527585414	2e-25	119
TP94976	chr3H	98.44	64	1	0	1	64	527658261	527658324	1e-23	113
TP62864	chr3H	100	41	0	0	1	41	528491805	528491845	1e-12	76.8
TP7800	chr3H	100	64	0	0	1	64	528957278	528957341	2e-25	119
TP94551	chr3H	100	39	0	0	1	39	528973672	528973710	2e-11	73.1	QLrol.FW-3H
TP99228	chr3H	100	58	0	0	1	58	528973675	528973618	5e-22	108
TP54839	chr3H	98.39	62	1	0	1	62	530113710	530113649	1e-22	110
TP69601	chr3H	96.88	64	1	1	1	64	530269190	530269128	2e-21	106
TP92447	chr3H	100	39	0	0	1	39	531062341	531062303	2e-11	73.1
TP102022	chr3H	98.44	64	1	0	1	64	538157437	538157500	1e-23	113
TP29917	chr3H	100	63	0	0	1	63	538157440	538157378	8e-25	117
TP72711	chr3H	97.56	41	1	0	1	41	538524622	538524582	6e-11	71.3
TP38394	chr3H	100	41	0	0	1	41	539432676	539432716	1e-12	76.8
TP58234	chr3H	100	38	0	0	1	38	539540543	539540506	6e-11	71.3
TP40643	chr3H	98.44	64	1	0	1	64	539800524	539800587	1e-23	113
TP29446	chr3H	100	54	0	0	1	54	540876091	540876038	8e-20	100
TP55732	chr3H	98.44	64	1	0	1	64	541491180	541491117	1e-23	113
TP11759	chr3H	98.44	64	1	0	1	64	541907375	541907312	1e-23	113
TP79219	chr3H	100	64	0	0	1	64	542299024	542299087	2e-25	119
TP92255	chr3H	100	50	0	0	1	50	542308971	542309020	1e-17	93.5
TP59276	chr3H	98.44	64	1	0	1	64	542331864	542331927	1e-23	113
TP57924	chr3H	98.44	64	1	0	1	64	543125143	543125080	1e-23	113
TP92490	chr3H	100	56	0	0	1	56	543658673	543658728	6e-21	104
TP62390	chr3H	96.88	64	2	0	1	64	547641835	547641772	5e-22	108
TP37575	chr3H	98.44	64	1	0	1	64	548571942	548572005	1e-23	113
TP97646	chr3H	100	62	0	0	1	62	548945253	548945192	3e-24	115
TP84497	chr3H	100	64	0	0	1	64	550216692	550216755	2e-25	119
TP71286	chr3H	100	64	0	0	1	64	552892578	552892641	2e-25	119
TP90398	chr3H	98.44	64	1	0	1	64	552910023	552910086	1e-23	113
TP10171	chr3H	98	50	0	1	1	50	553113090	553113042	2e-15	86.1
TP18571	chr3H	100	62	0	0	1	62	554180556	554180617	3e-24	115
TP98872	chr3H	100	64	0	0	1	64	554582149	554582212	2e-25	119
TP40389	chr3H	98	50	1	0	1	50	555847024	555847073	6e-16	87.9
TP102714	chr3H	98.44	64	1	0	1	64	555847667	555847604	1e-23	113
TP81743	chr3H	100	64	0	0	1	64	557078430	557078367	2e-25	119
TP6135	chr3H	100	64	0	0	1	64	557219918	557219855	2e-25	119
TP231	chr3H	100	63	0	0	1	63	558243701	558243639	8e-25	117
TP92475	chr3H	98.44	64	1	0	1	64	558720804	558720867	1e-23	113
TP99531	chr3H	100	64	0	0	1	64	558855760	558855823	2e-25	119
TP62786	chr3H	100	64	0	0	1	64	559148325	559148262	2e-25	119
TP16719	chr3H	100	64	0	0	1	64	559682308	559682245	2e-25	119
TP50642	chr3H	100	64	0	0	1	64	559682560	559682497	2e-25	119
TP11718	chr3H	98.44	64	1	0	1	64	559696413	559696350	1e-23	113
TP57108	chr3H	100	48	0	0	1	48	559880170	559880123	2e-16	89.8
TP32273	chr3H	98.44	64	1	0	1	64	561431688	561431751	1e-23	113
TP55308	chr3H	97.62	42	0	1	1	42	561521353	561521393	6e-11	71.3
TP5928	chr3H	100	45	0	0	1	45	563431282	563431326	8e-15	84.2
TP42443	chr3H	98.44	64	1	0	1	64	563991133	563991070	1e-23	113
TP54130	chr3H	100	47	0	0	1	47	567047823	567047869	6e-16	87.9
TP96665	chr3H	95.31	64	3	0	1	64	567399004	567398941	2e-20	102
TP37539	chr3H	98.44	64	1	0	1	64	567420971	567420908	1e-23	113
TP30440	chr3H	100	64	0	0	1	64	568174568	568174505	2e-25	119
TP42967	chr3H	100	64	0	0	1	64	568582304	568582367	2e-25	119
TP9651	chr3H	98.44	64	1	0	1	64	568712558	568712621	1e-23	113
TP87896	chr3H	100	64	0	0	1	64	568986425	568986362	2e-25	119
TP17421	chr3H	97.22	36	1	0	1	36	568987888	568987853	4e-08	62.1
TP99284	chr3H	100	64	0	0	1	64	570002175	570002238	2e-25	119
TP32247	chr3H	100	64	0	0	1	64	570002178	570002115	2e-25	119
TP44324	chr3H	100	64	0	0	1	64	571499080	571499143	2e-25	119	QNDVI.CW-3H.2
TP99487	chr3H	98.44	64	1	0	1	64	571500548	571500485	1e-23	113
TP26498	chr3H	100	64	0	0	1	64	571952683	571952746	2e-25	119
TP63653	chr3H	98.44	64	1	0	1	64	572643317	572643254	1e-23	113
TP84177	chr3H	100	40	0	0	1	40	573129197	573129158	5e-12	75
TP32004	chr3H	100	62	0	0	1	62	574024323	574024262	3e-24	115
TP78861	chr3H	100	62	0	0	1	62	574436455	574436516	3e-24	115
TP31276	chr3H	100	64	0	0	1	64	574661765	574661702	2e-25	119
TP39415	chr3H	96.88	64	2	0	1	64	574669654	574669591	5e-22	108
TP12887	chr3H	100	64	0	0	1	64	574671846	574671783	2e-25	119
TP19697	chr3H	100	56	0	0	1	56	575768353	575768298	6e-21	104
TP8221	chr3H	97.73	44	1	0	1	44	576024306	576024263	1e-12	76.8
TP27133	chr3H	98.33	60	1	0	1	60	577221457	577221398	2e-21	106
TP98176	chr3H	98.44	64	1	0	1	64	582536308	582536371	1e-23	113
TP68793	chr3H	98.28	58	1	0	1	58	584396965	584397022	2e-20	102
TP64033	chr3H	100	64	0	0	1	64	587822643	587822706	2e-25	119
TP86947	chr3H	100	64	0	0	1	64	589934791	589934854	2e-25	119
TP56400	chr3H	100	64	0	0	1	64	592563862	592563799	2e-25	119
TP100288	chr3H	98.44	64	1	0	1	64	594740498	594740435	1e-23	113
TP27895	chr3H	100	64	0	0	1	64	594833454	594833517	2e-25	119
TP79551	chr3H	98.44	64	1	0	1	64	596517581	596517518	1e-23	113
TP27542	chr3H	98.44	64	1	0	1	64	596519858	596519795	1e-23	113
TP50301	chr3H	100	64	0	0	1	64	596938831	596938768	2e-25	119
TP3853	chr3H	98.44	64	1	0	1	64	597048519	597048456	1e-23	113
TP23435	chr3H	97.73	44	1	0	2	45	597246580	597246537	1e-12	76.8
TP31116	chr3H	100	64	0	0	1	64	601928750	601928687	2e-25	119
TP85290	chr3H	100	64	0	0	1	64	601928975	601929038	2e-25	119
TP44013	chr3H	100	45	0	0	1	45	602020214	602020258	8e-15	84.2
TP7255	chr3H	100	64	0	0	1	64	605835273	605835336	2e-25	119
TP10142	chr3H	100	64	0	0	1	64	606013109	606013046	2e-25	119
TP11715	chr3H	100	64	0	0	1	64	606584745	606584808	2e-25	119
TP59101	chr3H	100	64	0	0	1	64	607248214	607248277	2e-25	119
TP7712	chr3H	100	64	0	0	1	64	607381213	607381150	2e-25	119
TP19566	chr3H	100	64	0	0	1	64	607683578	607683515	2e-25	119
TP18120	chr3H	98.31	59	1	0	1	59	607950438	607950496	6e-21	104
TP76793	chr3H	98.44	64	1	0	1	64	608255272	608255209	1e-23	113
TP18633	chr3H	98.36	61	1	0	1	61	608855659	608855599	5e-22	108
TP26016	chr3H	100	64	0	0	1	64	610149145	610149082	2e-25	119
TP21817	chr3H	100	64	0	0	1	64	610151387	610151450	2e-25	119
TP55233	chr3H	100	35	0	0	1	35	610697491	610697457	3e-09	65.8
TP10430	chr3H	98.44	64	1	0	1	64	611444890	611444953	1e-23	113
TP55538	chr3H	98.44	64	1	0	1	64	611454726	611454663	1e-23	113
TP33789	chr3H	97.92	48	1	0	1	48	611554465	611554418	8e-15	84.2
TP6524	chr3H	98.44	64	1	0	1	64	611560841	611560904	1e-23	113
TP86589	chr3H	100	64	0	0	1	64	613863810	613863747	2e-25	119
TP36654	chr3H	100	47	0	0	1	47	613897857	613897811	6e-16	87.9
TP75783	chr3H	98.44	64	1	0	1	64	614516210	614516147	1e-23	113
TP26324	chr3H	100	64	0	0	1	64	614752035	614752098	2e-25	119
TP1949	chr3H	100	64	0	0	1	64	615132793	615132856	2e-25	119
TP77801	chr3H	100	64	0	0	1	64	615377368	615377431	2e-25	119
TP87756	chr3H	100	64	0	0	1	64	615952971	615952908	2e-25	119
TP85617	chr3H	100	40	0	0	1	40	622785639	622785678	5e-12	75
TP21094	chr3H	100	61	0	0	1	61	623229504	623229444	1e-23	113
TP39625	chr3H	95.56	45	1	1	1	45	629447027	629446984	6e-11	71.3
TP72513	chr3H	98.44	64	1	0	1	64	629447219	629447282	1e-23	113
TP93977	chr3H	100	48	0	0	1	48	630721734	630721781	2e-16	89.8
TP93979	chr3H	100	48	0	0	1	48	630721734	630721781	2e-16	89.8
TP85868	chr3H	100	64	0	0	1	64	633154774	633154711	2e-25	119
TP73788	chr3H	100	54	0	0	1	54	634459295	634459242	8e-20	100
TP58988	chr3H	100	64	0	0	1	64	636430446	636430383	2e-25	119
TP38342	chr3H	100	44	0	0	1	44	636746480	636746437	3e-14	82.4
TP53856	chr3H	100	64	0	0	1	64	637230642	637230579	2e-25	119
TP97184	chr3H	98.44	64	1	0	1	64	638065659	638065596	1e-23	113
TP18152	chr3H	100	51	0	0	1	51	638300851	638300801	4e-18	95.3
TP45040	chr3H	100	64	0	0	1	64	638430080	638430143	2e-25	119
TP89982	chr3H	98.44	64	1	0	1	64	638521725	638521788	1e-23	113
TP606	chr3H	100	64	0	0	1	64	641981485	641981422	2e-25	119
TP25746	chr3H	100	64	0	0	1	64	643146474	643146411	2e-25	119
TP59352	chr3H	100	49	0	0	1	49	643147412	643147460	5e-17	91.6
TP27403	chr3H	100	64	0	0	1	64	643147415	643147352	2e-25	119
TP61099	chr3H	98.44	64	1	0	1	64	644151511	644151448	1e-23	113
TP1419	chr3H	100	64	0	0	1	64	645108517	645108454	2e-25	119
TP54360	chr3H	100	64	0	0	1	64	645461774	645461837	2e-25	119
TP19703	chr3H	96.88	64	2	0	1	64	645624096	645624033	5e-22	108
TP30917	chr3H	100	64	0	0	1	64	645746589	645746652	2e-25	119
TP3145	chr3H	96.88	64	2	0	1	64	645873037	645873100	5e-22	108
TP170	chr3H	100	64	0	0	1	64	646608244	646608307	2e-25	119
TP70893	chr3H	98.44	64	1	0	1	64	648174945	648174882	1e-23	113
TP42084	chr3H	100	59	0	0	1	59	650555909	650555967	1e-22	110
TP42085	chr3H	100	59	0	0	1	59	650555909	650555967	1e-22	110
TP44715	chr3H	97.78	45	1	0	1	45	650913600	650913644	4e-13	78.7
TP93821	chr3H	98.44	64	1	0	1	64	650926348	650926411	1e-23	113
TP95848	chr3H	100	64	0	0	1	64	650931294	650931357	2e-25	119
TP102159	chr3H	100	64	0	0	1	64	651828727	651828664	2e-25	119
TP63198	chr3H	100	50	0	0	1	50	651871181	651871132	1e-17	93.5
TP77458	chr3H	100	62	0	0	1	62	651960240	651960179	3e-24	115
TP60824	chr3H	100	64	0	0	1	64	651996790	651996853	2e-25	119
TP65320	chr3H	98.44	64	1	0	1	64	652500326	652500263	1e-23	113
TP4994	chr3H	100	64	0	0	1	64	652871147	652871084	2e-25	119
TP36169	chr3H	98.44	64	1	0	1	64	653266760	653266823	1e-23	113
TP29204	chr3H	98.44	64	1	0	1	64	653281155	653281218	1e-23	113
TP75368	chr3H	100	64	0	0	1	64	653295075	653295012	2e-25	119
TP77331	chr3H	100	62	0	0	1	62	653555630	653555569	3e-24	115
TP35412	chr3H	100	64	0	0	1	64	654337264	654337201	2e-25	119
TP42398	chr3H	100	55	0	0	1	55	654818376	654818430	2e-20	102
TP76132	chr3H	100	64	0	0	1	64	655147094	655147031	2e-25	119
TP46573	chr3H	98.44	64	1	0	1	64	655180987	655180924	1e-23	113
TP58575	chr3H	98.44	64	1	0	1	64	655225989	655225926	1e-23	113
TP84699	chr3H	98.44	64	1	0	1	64	655238369	655238306	1e-23	113
TP24733	chr3H	100	64	0	0	1	64	655324859	655324796	2e-25	119
TP95985	chr3H	98.44	64	1	0	1	64	655500988	655501051	1e-23	113
TP78601	chr3H	100	40	0	0	1	40	655522769	655522730	5e-12	75
TP33701	chr3H	100	64	0	0	1	64	655694993	655694930	2e-25	119
TP37619	chr3H	97.62	42	1	0	1	42	655871000	655870959	2e-11	73.1
TP100255	chr3H	98.44	64	1	0	1	64	656327141	656327078	1e-23	113
TP66096	chr3H	100	64	0	0	1	64	656822226	656822163	2e-25	119
TP6231	chr3H	100	42	0	0	1	42	657134605	657134564	4e-13	78.7
TP38846	chr3H	98.44	64	1	0	1	64	657630732	657630795	1e-23	113
TP9895	chr3H	98.44	64	1	0	1	64	658253956	658253893	1e-23	113
TP99656	chr3H	98.44	64	1	0	1	64	658465779	658465842	1e-23	113
TP71890	chr3H	98.44	64	1	0	1	64	658475582	658475519	1e-23	113
TP25913	chr3H	100	49	0	0	1	49	658650755	658650803	5e-17	91.6
TP39555	chr3H	100	64	0	0	1	64	658650758	658650695	2e-25	119
TP12202	chr3H	100	62	0	0	1	62	658782947	658782886	3e-24	115
TP6953	chr3H	100	64	0	0	1	64	659174643	659174706	2e-25	119
TP51346	chr3H	98.44	64	1	0	1	64	659190831	659190894	1e-23	113
TP85009	chr3H	100	52	0	0	1	52	659333512	659333461	1e-18	97.1
TP53476	chr3H	100	42	0	0	1	42	659501858	659501899	4e-13	78.7
TP27100	chr3H	97.14	35	1	0	7	41	659857979	659857945	1e-07	60.2
TP64580	chr3H	98.44	64	1	0	1	64	659862193	659862256	1e-23	113
TP64346	chr3H	98.44	64	1	0	1	64	659935693	659935630	1e-23	113
TP42348	chr3H	100	39	0	0	1	39	660001099	660001061	2e-11	73.1
TP14781	chr3H	98.44	64	1	0	1	64	660063635	660063698	1e-23	113
TP91712	chr3H	98.44	64	1	0	1	64	660273411	660273474	1e-23	113
TP41284	chr3H	100	39	0	0	1	39	660279509	660279547	2e-11	73.1
TP94175	chr3H	98.08	52	1	0	1	52	660286705	660286654	5e-17	91.6
TP40942	chr3H	100	64	0	0	1	64	660293807	660293870	2e-25	119
TP81213	chr3H	100	61	0	0	4	64	660328773	660328833	1e-23	113
TP81747	chr3H	98.44	64	1	0	1	64	660363483	660363420	1e-23	113
TP19704	chr3H	98.44	64	1	0	1	64	660620615	660620678	1e-23	113
TP93270	chr3H	100	64	0	0	1	64	660620618	660620555	2e-25	119
TP18759	chr3H	98.44	64	1	0	1	64	660740989	660740926	1e-23	113
TP17466	chr3H	100	49	0	0	16	64	660794810	660794762	5e-17	91.6
TP31528	chr3H	100	64	0	0	1	64	660835382	660835445	2e-25	119
TP13297	chr3H	98.44	64	1	0	1	64	660844065	660844002	1e-23	113
TP100413	chr3H	96.88	64	2	0	1	64	660856362	660856425	5e-22	108
TP101397	chr3H	98.44	64	1	0	1	64	660919579	660919642	1e-23	113
TP10571	chr3H	98.41	63	1	0	1	63	660937806	660937868	4e-23	111
TP88051	chr3H	98.44	64	1	0	1	64	660973043	660973106	1e-23	113
TP99331	chr3H	100	64	0	0	1	64	661285132	661285195	2e-25	119
TP58758	chr3H	98.44	64	1	0	1	64	661418215	661418278	1e-23	113
TP98549	chr3H	100	64	0	0	1	64	661423499	661423562	2e-25	119
TP22726	chr3H	98.44	64	1	0	1	64	661522190	661522127	1e-23	113
TP38919	chr3H	98.28	58	1	0	1	58	661637423	661637366	2e-20	102
TP43583	chr3H	94	50	3	0	1	50	661659434	661659385	1e-12	76.8
TP53859	chr3H	100	64	0	0	1	64	661788592	661788655	2e-25	119
TP72091	chr3H	98.44	64	1	0	1	64	662449016	662448953	1e-23	113
TP80333	chr3H	98.44	64	1	0	1	64	662456936	662456999	1e-23	113
TP94356	chr3H	100	61	0	0	3	63	662609171	662609231	1e-23	113
TP89602	chr3H	95.24	42	1	1	1	42	662766276	662766236	3e-09	65.8
TP82887	chr3H	98.44	64	1	0	1	64	663174658	663174721	1e-23	113
TP19665	chr3H	100	64	0	0	1	64	663185708	663185771	2e-25	119
TP60785	chr3H	100	48	0	0	1	48	663190439	663190486	2e-16	89.8
TP19915	chr3H	97.62	42	1	0	1	42	663540732	663540691	2e-11	73.1
TP74714	chr3H	100	64	0	0	1	64	663566764	663566827	2e-25	119
TP17892	chr3H	100	64	0	0	1	64	663632761	663632698	2e-25	119
TP5573	chr3H	98.44	64	1	0	1	64	663653913	663653976	1e-23	113
TP26360	chr3H	100	63	0	0	1	63	663676132	663676194	8e-25	117
TP5983	chr3H	98.44	64	1	0	1	64	663676856	663676919	1e-23	113
TP862	chr3H	95.31	64	2	1	1	64	663822285	663822347	8e-20	100
TP99098	chr3H	98.28	58	1	0	1	58	663822288	663822231	2e-20	102
TP12270	chr3H	100	64	0	0	1	64	664284808	664284871	2e-25	119
TP47848	chr3H	98.44	64	1	0	1	64	664284811	664284748	1e-23	113
TP57597	chr3H	100	64	0	0	1	64	664304818	664304881	2e-25	119
TP16819	chr3H	100	41	0	0	1	41	664403065	664403105	1e-12	76.8
TP35308	chr3H	98.44	64	1	0	1	64	664503360	664503297	1e-23	113
TP81167	chr3H	98.44	64	1	0	1	64	664588713	664588776	1e-23	113
TP29755	chr3H	98.44	64	1	0	1	64	664839019	664838956	1e-23	113
TP61314	chr3H	98.44	64	1	0	1	64	664884777	664884714	1e-23	113
TP88094	chr3H	100	64	0	0	1	64	664990407	664990344	2e-25	119
TP75690	chr3H	100	64	0	0	1	64	665075201	665075264	2e-25	119
TP84358	chr3H	98.44	64	1	0	1	64	665187587	665187524	1e-23	113
TP17906	chr3H	100	64	0	0	1	64	665427406	665427343	2e-25	119
TP12838	chr3H	98.44	64	1	0	1	64	666351114	666351177	1e-23	113
TP31622	chr3H	100	54	0	0	1	54	666468648	666468595	8e-20	100
TP61442	chr3H	98.44	64	1	0	1	64	667174896	667174959	1e-23	113
TP32492	chr3H	98.44	64	1	0	1	64	667646262	667646325	1e-23	113
TP100008	chr3H	96.88	64	2	0	1	64	667646265	667646202	5e-22	108
TP13478	chr3H	98.44	64	1	0	1	64	667651414	667651477	1e-23	113
TP56441	chr3H	98.44	64	1	0	1	64	667793172	667793109	1e-23	113
TP80118	chr3H	100	64	0	0	1	64	668895938	668896001	2e-25	119
TP87453	chr3H	100	53	0	0	1	53	669155833	669155885	3e-19	99
TP88842	chr3H	98.08	52	1	0	1	52	670151707	670151656	5e-17	91.6
TP67684	chr3H	98.44	64	1	0	1	64	670168775	670168838	1e-23	113
TP87259	chr3H	98.28	58	1	0	1	58	670197022	670197079	2e-20	102
TP31790	chr3H	100	63	0	0	1	63	670197025	670196963	8e-25	117
TP8870	chr3H	100	44	0	0	1	44	670345489	670345532	3e-14	82.4
TP52174	chr3H	97.87	47	1	0	1	47	670383715	670383761	3e-14	82.4
TP100943	chr3H	96.88	64	2	0	1	64	670578143	670578206	5e-22	108
TP58592	chr3H	96.49	57	1	1	1	57	670588631	670588576	1e-17	93.5
TP50004	chr3H	96.88	64	2	0	1	64	670591067	670591130	5e-22	108
TP38918	chr3H	96.88	64	2	0	1	64	670915364	670915427	5e-22	108
TP8813	chr3H	96.88	64	2	0	1	64	671341405	671341342	5e-22	108
TP83661	chr3H	98.11	53	1	0	1	53	671348317	671348369	1e-17	93.5
TP56873	chr3H	98.44	64	1	0	1	64	671499004	671499067	1e-23	113
TP21411	chr3H	98.36	61	1	0	1	61	671738232	671738172	5e-22	108
TP50419	chr3H	100	64	0	0	1	64	672001943	672001880	2e-25	119
TP82412	chr3H	98.44	64	1	0	1	64	672220524	672220587	1e-23	113
TP45334	chr3H	98.44	64	1	0	1	64	672659358	672659421	1e-23	113
TP18741	chr3H	96.88	64	2	0	1	64	672682805	672682742	5e-22	108
TP42788	chr3H	96.88	64	2	0	1	64	672932394	672932331	5e-22	108
TP70131	chr3H	98.44	64	1	0	1	64	672948002	672947939	1e-23	113
TP90104	chr3H	96.88	64	2	0	1	64	672960897	672960960	5e-22	108
TP32328	chr3H	96.88	64	2	0	1	64	673054446	673054383	5e-22	108
TP15291	chr3H	98.44	64	1	0	1	64	673285665	673285602	1e-23	113
TP67678	chr3H	98.36	61	1	0	1	61	673562789	673562729	5e-22	108
TP89816	chr3H	98.44	64	1	0	1	64	673566119	673566056	1e-23	113
TP90541	chr3H	100	46	0	0	1	46	673722745	673722700	2e-15	86.1
TP97833	chr3H	100	64	0	0	1	64	674019348	674019285	2e-25	119
TP87195	chr3H	100	64	0	0	1	64	674020509	674020572	2e-25	119
[truncated: 3,068 more rows]

## Sheet: Sheet2
Marker Chromosome % identical matches Alignment length mismatch gapopen qstart qend sstart send evalue bitscore
JX648176.1 chr2H 99.71 2081 5 1 1 2080 523377195 523379275 0 3808
JX648176.1 chr2H 99.71 2081 5 1 1 2080 523377195 523379275 0 3808
